# Supplementary material for: Transcriptional outcomes and kinetic patterning of gene expression in response to NF-κB activation
Source: PubMed Central journal article supplement (PMC6147668; doi:10.1371/journal.pbio.2006347), 2018-09-10

A

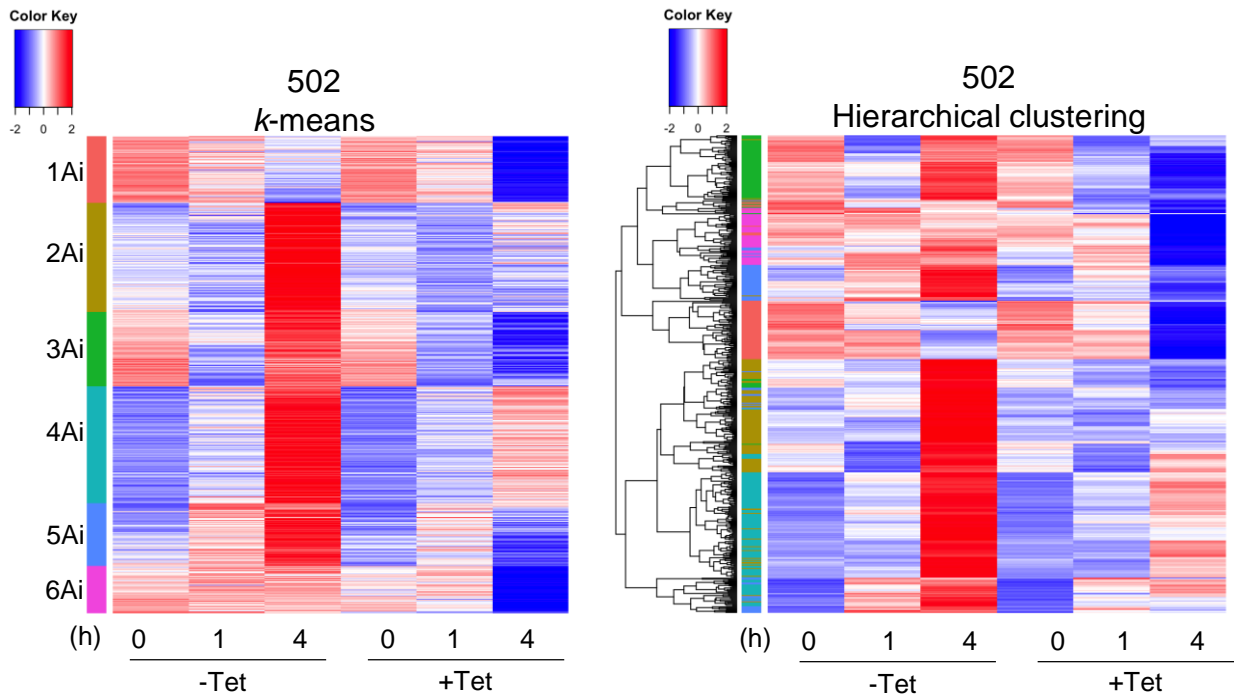

B

dnkBc<sup>↓</sup>, no RELA binding(502)

| Consensus sequence | P-value | Motif Name |
|--------------------|---------|------------|
|                    | 1e-11   | c-Myc      |

C

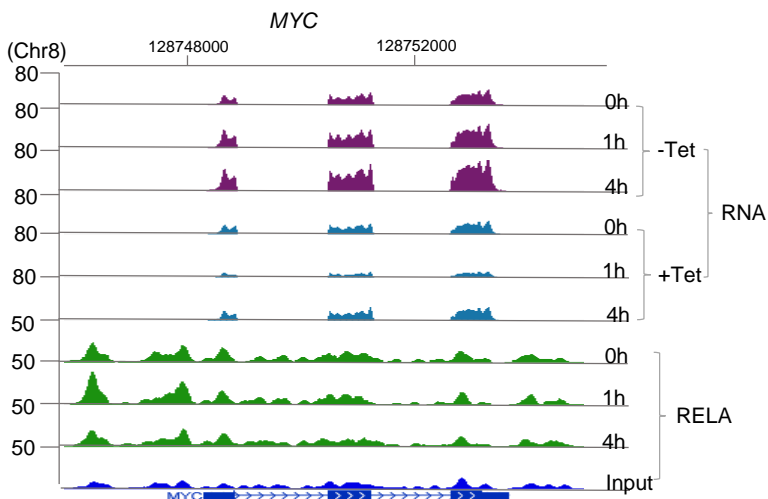

D

TF from 304

|        |         |         |        |
|--------|---------|---------|--------|
| RUNX3  | NCOA3   | ELMSAN1 | RELB   |
| SPEN   | SIN3A   | STAT5A  | BTG2   |
| PRMT1  | TP53    | SNAPC4  | NFKB1  |
| STAT6  | TAF4B   | GPBP1   | JUNB   |
| TCF20  | IRF1    | GABPB1  | KLF10  |
| ZBTB2  | ZBTB1   | REL     | HES1   |
| DDN    | POU2AF1 | ZNF267  | NFKBIZ |
| POU2F2 | NR1D1   | NFE2L2  |        |
| KDM2B  | MYC     | NFKB2   |        |
| ACTN4  | UBTF    | ZBTB10  |        |

TF from 85

|        |       |         |       |
|--------|-------|---------|-------|
| FOSB   | BACH2 | STAT3   | MEF2C |
| FOS    | BTG2  | ZNF395  | EGR1  |
| NR4A3  | DDIT3 | ARID3A  | SETX  |
| NR4A1  | IER2  | MEF2B   | AFF1  |
| KLF6   | RCOR1 | TCF4    | NCOA2 |
| ZNF165 | HBP1  | TSC22D1 |       |

E

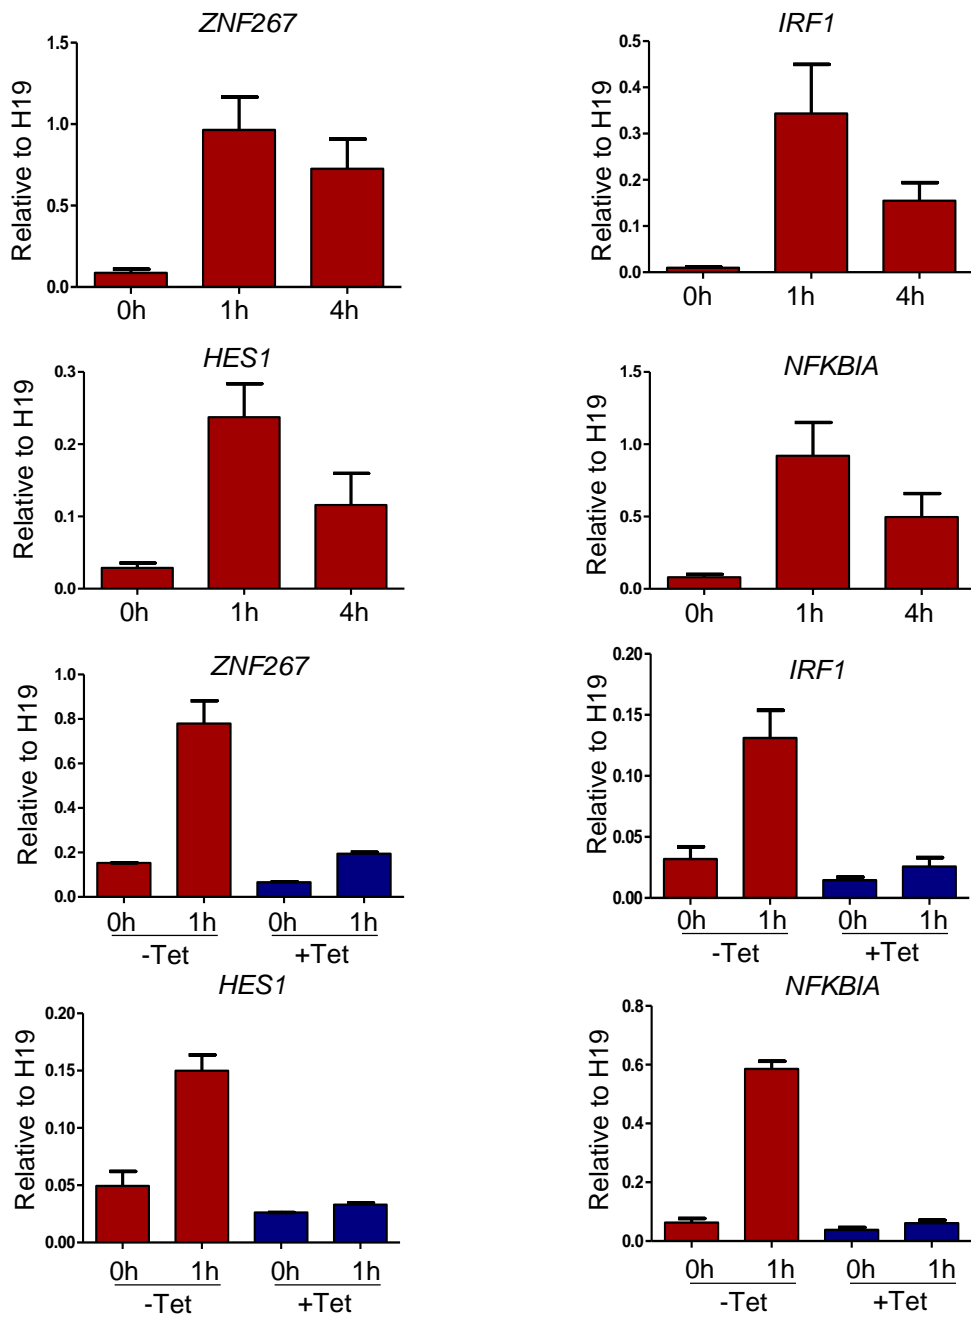

F

Motifs present in > 20% of promoters

|             |        |          |              |           |           |
|-------------|--------|----------|--------------|-----------|-----------|
| Pitx1       | Ptf1a  | BMAL1    | MITF         | Isl1      | n-Myc     |
| KLF14       | CRX    | Nkx2.5   | KLF3         | Eomes     | Arnt:Ahr  |
| SCL         | Erra   | PU.1-IRF | Nkx3.1       | c-Myc     | ZFX       |
| KLF5        | Smad4  | Nkx2.2   | COUP-TFII    | E2A       | Elk4      |
| AR-halfsite | Znf263 | ETV1     | Foxo1        | Elk1      | TATA-Box  |
| THRb        | Smad2  | E2A      | PR           | AP-2gamma | KLF10     |
| Smad3       | NPAS   | HIF-1b   | ETS1         | BMYB      | Etv2      |
| Maz         | Egr1   | E2F6     | Meis1        | AMYB      | AP-2alpha |
| Nanog       | Fli1   | ERG      | NF1-halfsite | Klf9      | Ap4       |
| Tgif2       | ZNF416 | Sp1      | GABPA        | E2F4      | Rbpj1     |
| Tbx5        | Bapx1  | ZNF467   | Olig2        | EHF       | NPAS2     |
| Tgif1       | ZNF711 | Ascl1    | Nkx6.1       | ELF1      | GATA3     |
| Nkx2.1      | HEB    | MYB      | NFY          | GSC       |           |

G

502

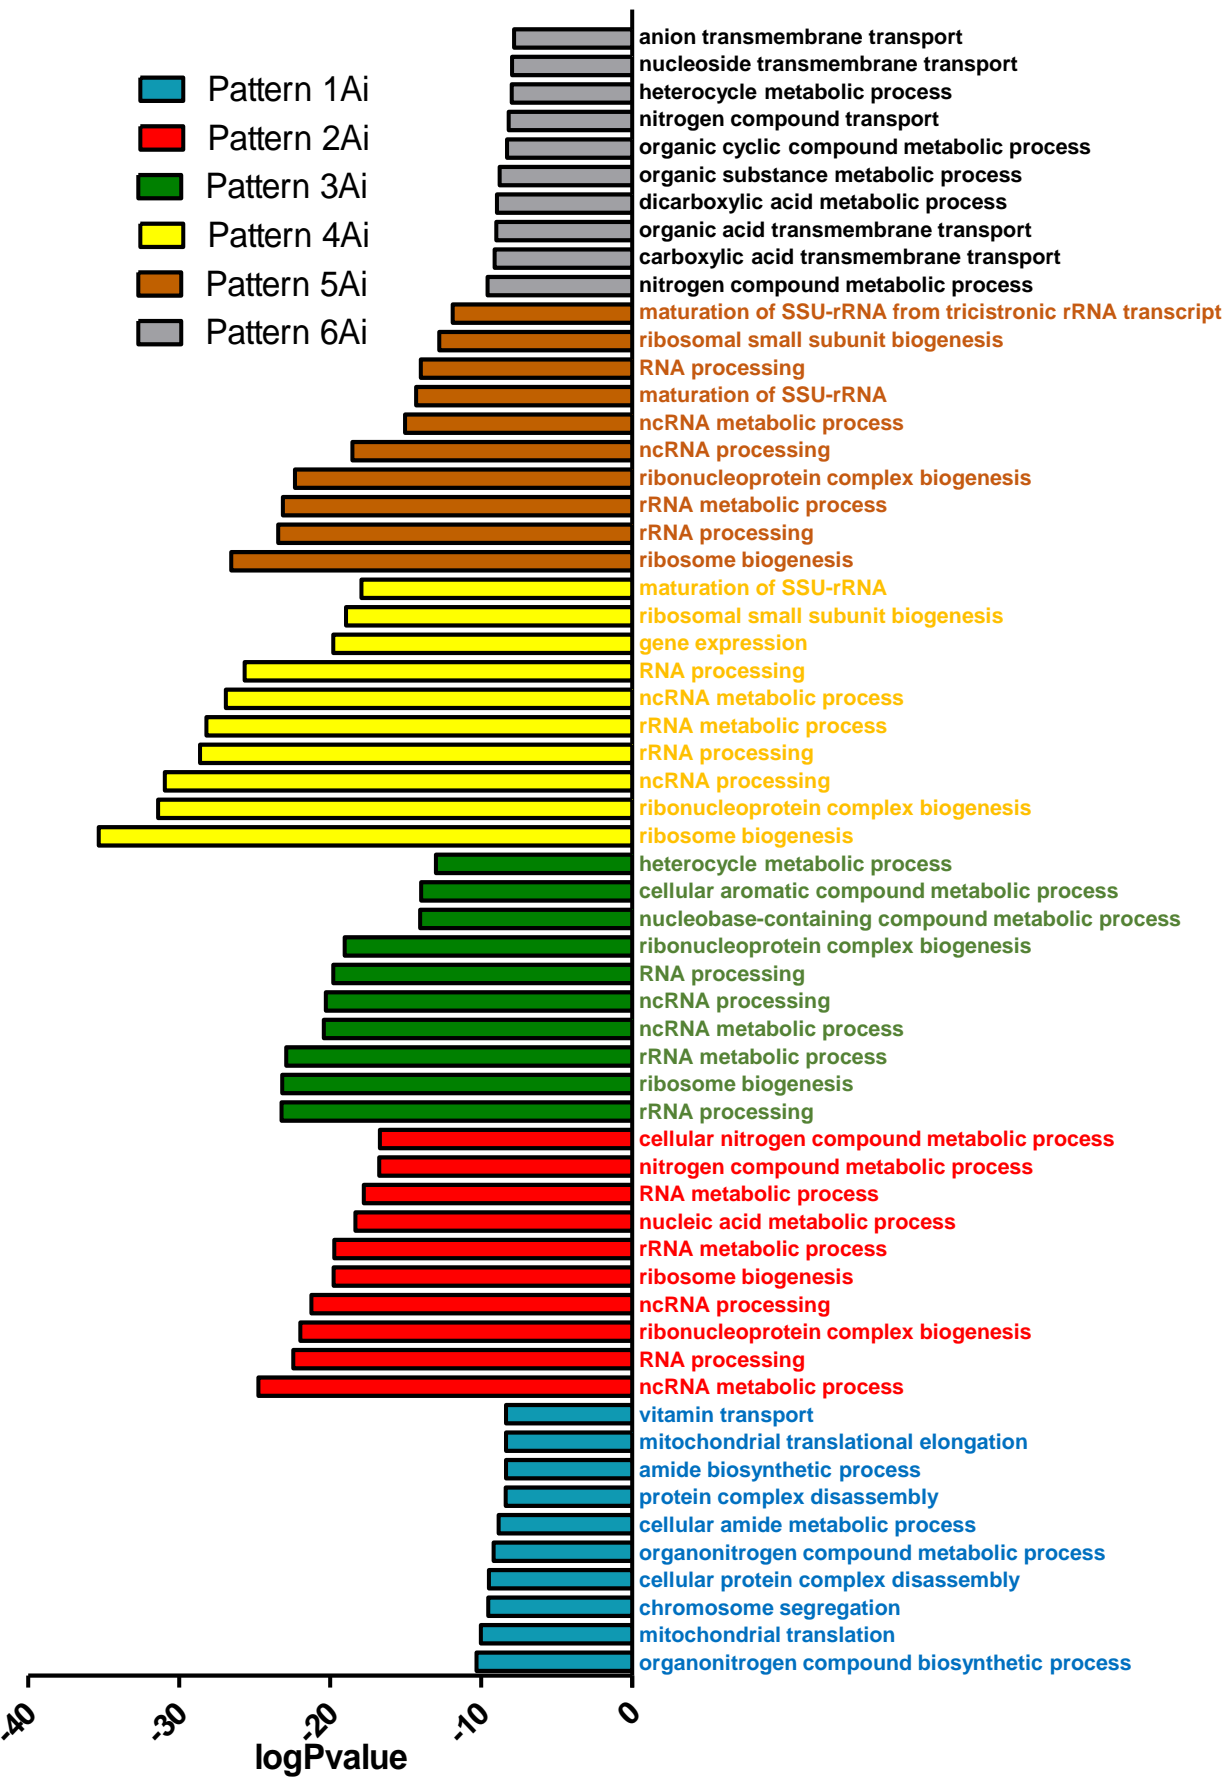

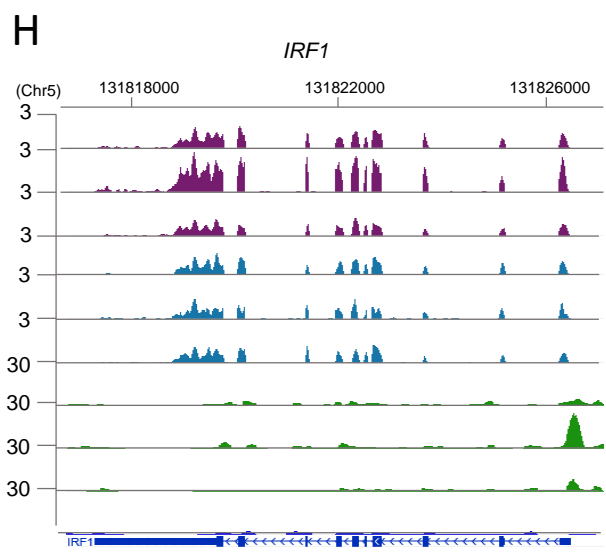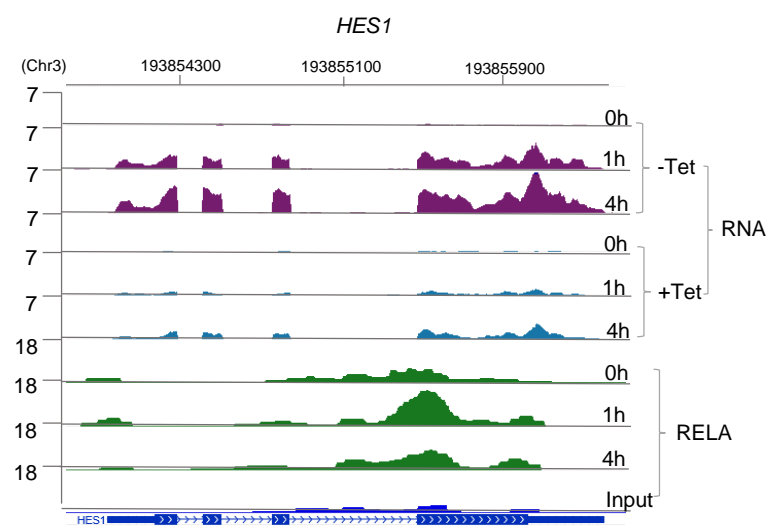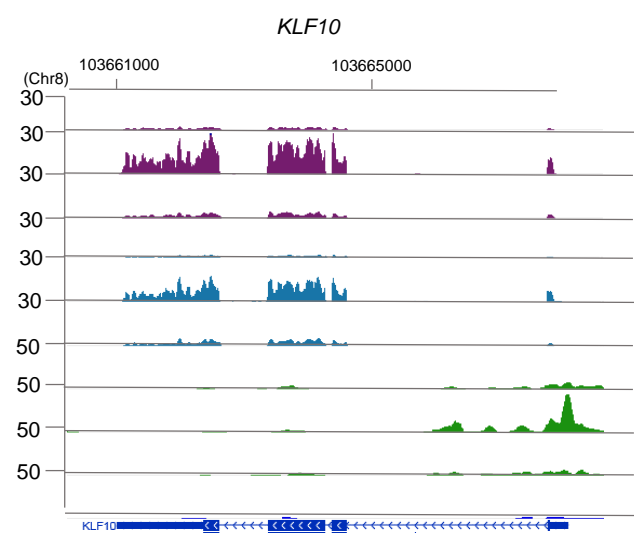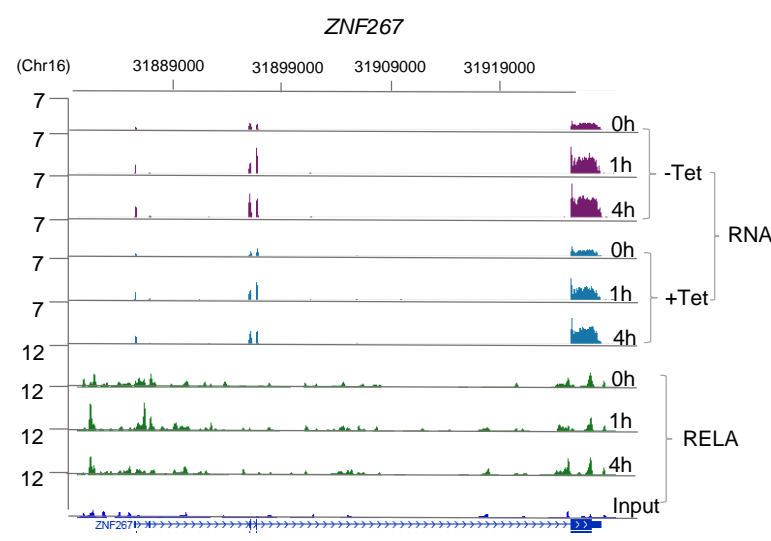

Supplement: pbio.2006347.s003.pdf [file pbio.2006347.s003.pdf]
