# Supplementary material for: Transcriptional outcomes and kinetic patterning of gene expression in response to NF-κB activation
Source: PubMed Central journal article supplement (PMC6147668; doi:10.1371/journal.pbio.2006347), 2018-09-10

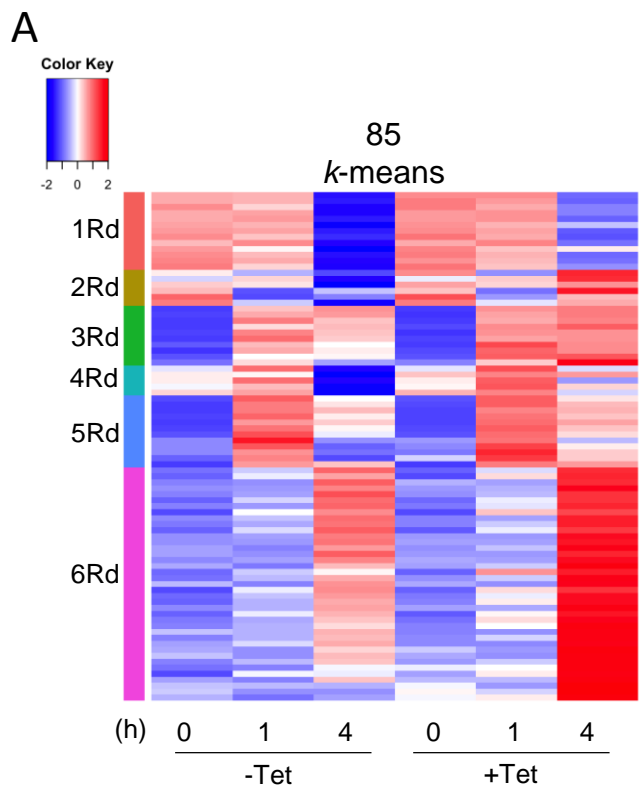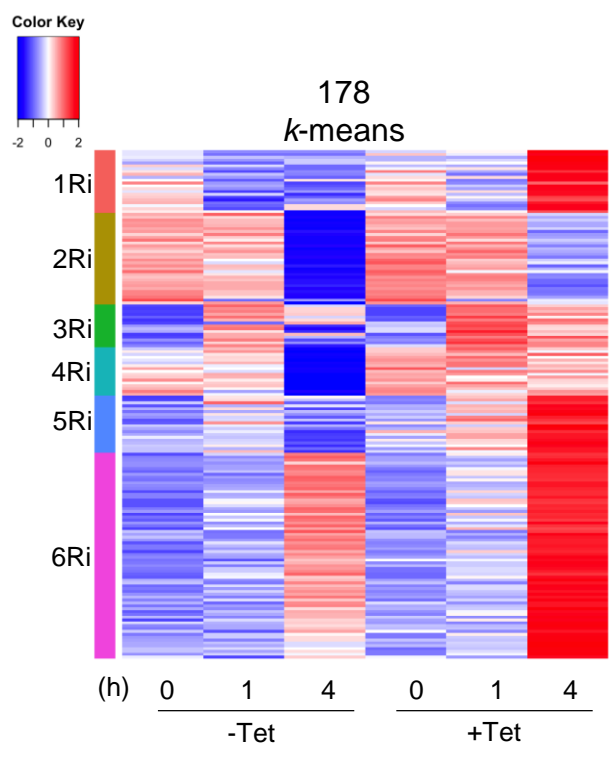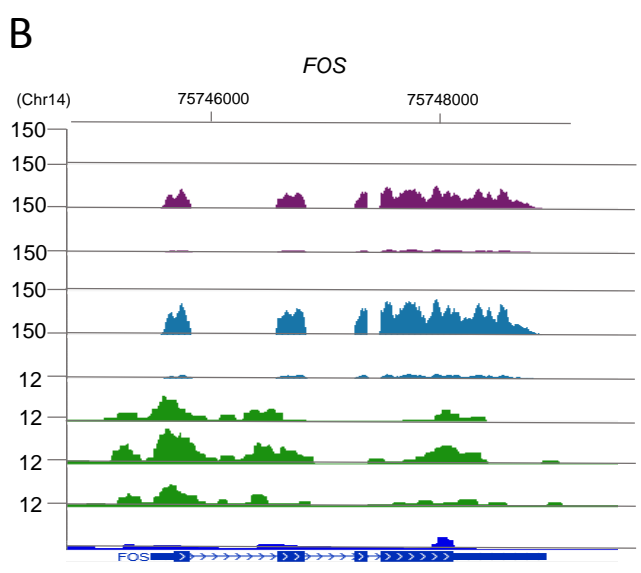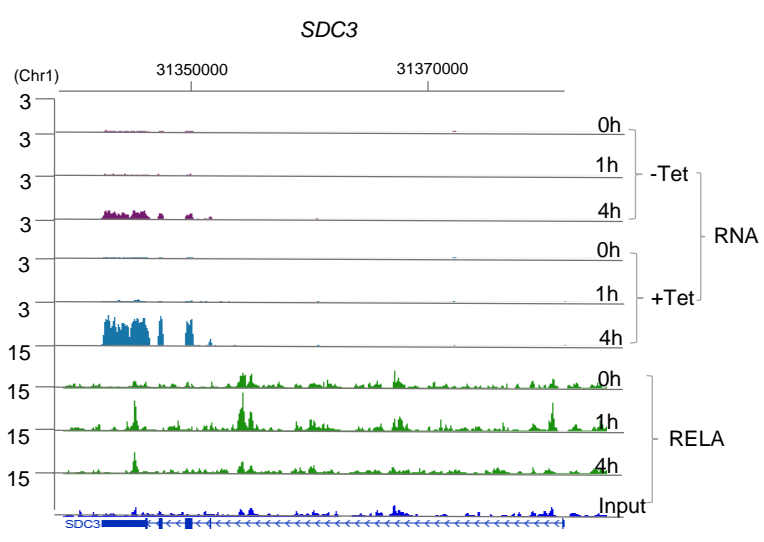

C

dnIkBa $\uparrow$ , RELA peaks (85)

| Consensus sequence | P-value | Motif Name   |
|--------------------|---------|--------------|
|                    | 1e-17   | AP.1         |
|                    | 1e-9    | NFkB-p50,p52 |
|                    | 1e-9    | NFkB-p65     |

Promoter regions: no significant motif

D

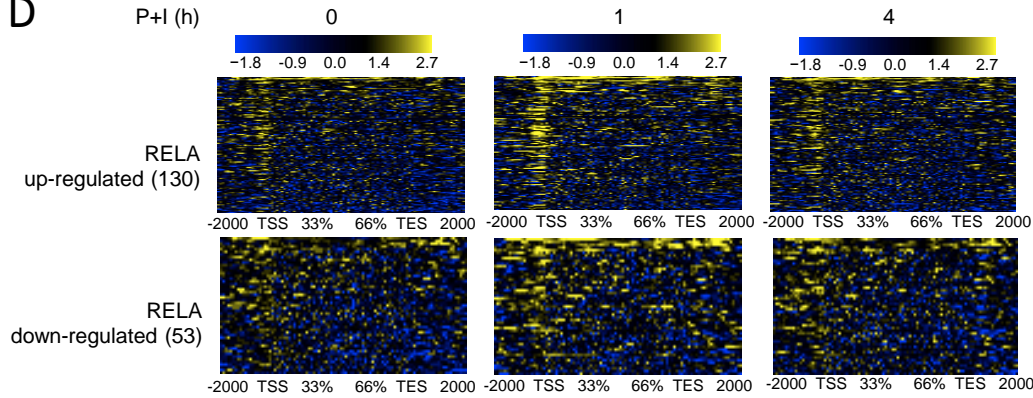

E

Motif present in >20% of promoters

|        |             |           |              |       |          |       |
|--------|-------------|-----------|--------------|-------|----------|-------|
| KLF14  | ERG         | ZFX       | MYB          | NFY   | FOXA1    | NFAT  |
| Maz    | AR-halfsite | AP-2alpha | PR           | Elk4  | SPDEF    | STAT4 |
| SCL    | CRX         | Tgif1     | Nkx6.1       | Atoh1 | Myf5     | Lhx1  |
| KLF5   | Nkx2.5      | Egr1      | AMYB         | Tcf12 | c-Myc    | Sox4  |
| Pitx1  | ETV1        | BMYB      | RXR          | PPARE | E2A      | Sox9  |
| Nkx2.1 | KLF3        | BMAL1     | PU.1-IRF     | NPAS  | Elk1     |       |
| THRb   | Ptf1a       | Ascl1     | ETS1         | E2F6  | ELF1     |       |
| Znf263 | AP-2gamma   | KLF10     | Klf9         | GABPA | TATA-Box |       |
| Nanog  | Sox10       | Ap4       | MyoG         | Isl1  | Etv2     |       |
| Bapx1  | HEB         | Sox3      | E2F4         | EHF   | Rbpj1    |       |
| ZNF711 | Nkx3.1      | Erra      | EBF1         | Tcf21 | Klf4     |       |
| Nkx2.2 | COUP-TFII   | Smad4     | Sox6         | Atf1  | Lhx3     |       |
| Smad3  | Foxo1       | Fli1      | Smad2        | MyoD  | ZNF416   |       |
| Tgif2  | Sp1         | E2A       | Meis1        | Olig2 | GSC      |       |
| Tbx5   | ZNF467      | HIF-1b    | NF1-halfsite | Eomes | ELF5     |       |

F

>20 percent have motif on promoters

dnIkBa $\downarrow$ (78)      dnIkBa $\uparrow$ (57)

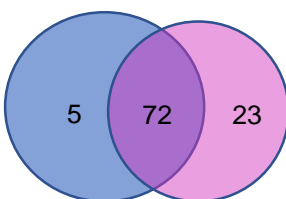

5

|          |
|----------|
| MITF     |
| n-Myc    |
| Arnt:Ahr |
| NPAS2    |
| GATA3    |

23

|       |       |       |       |
|-------|-------|-------|-------|
| Sox10 | Atoh1 | FOXA1 | NFAT  |
| Sox3  | Tcf12 | SPDEF | STAT4 |
| RXR   | PPARE | Myf5  | Lhx1  |
| MyoG  | Tcf21 | Klf4  | Sox4  |
| EBF1  | Atf1  | Lhx3  | Sox9  |
| Sox6  | MyoD  | ELF5  |       |

**G**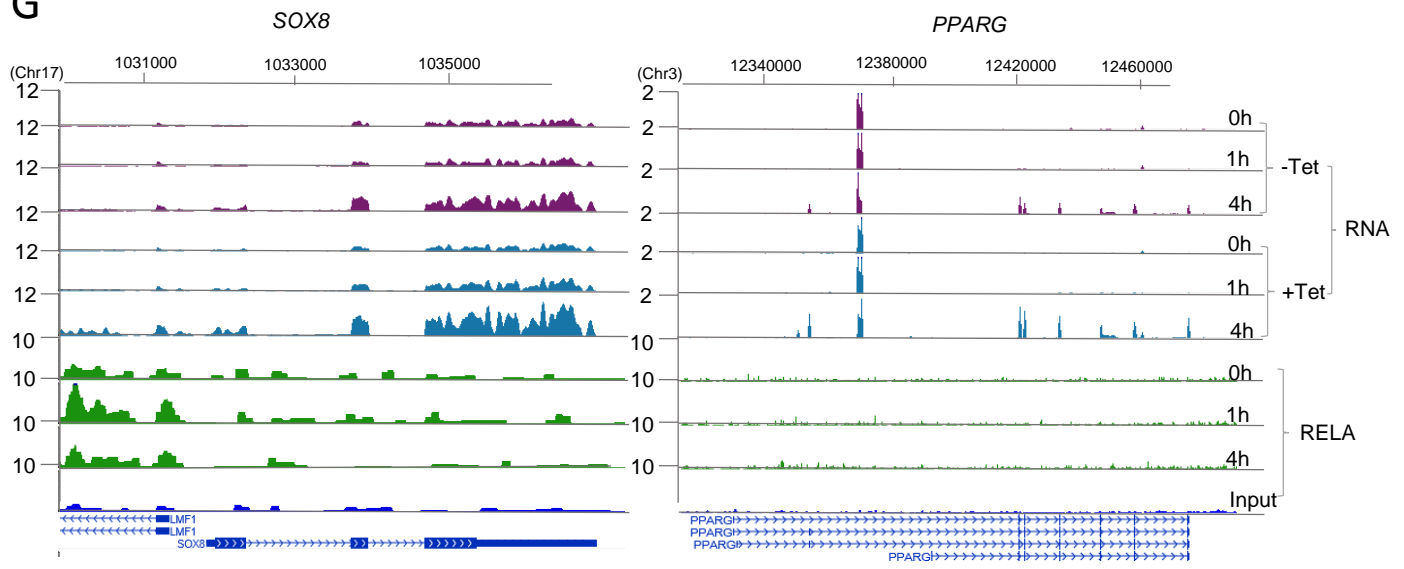

H

85

- Pattern 1Rd
- Pattern 2Rd
- Pattern 3Rd
- Pattern 4Rd
- Pattern 5Rd
- Pattern 6Rd

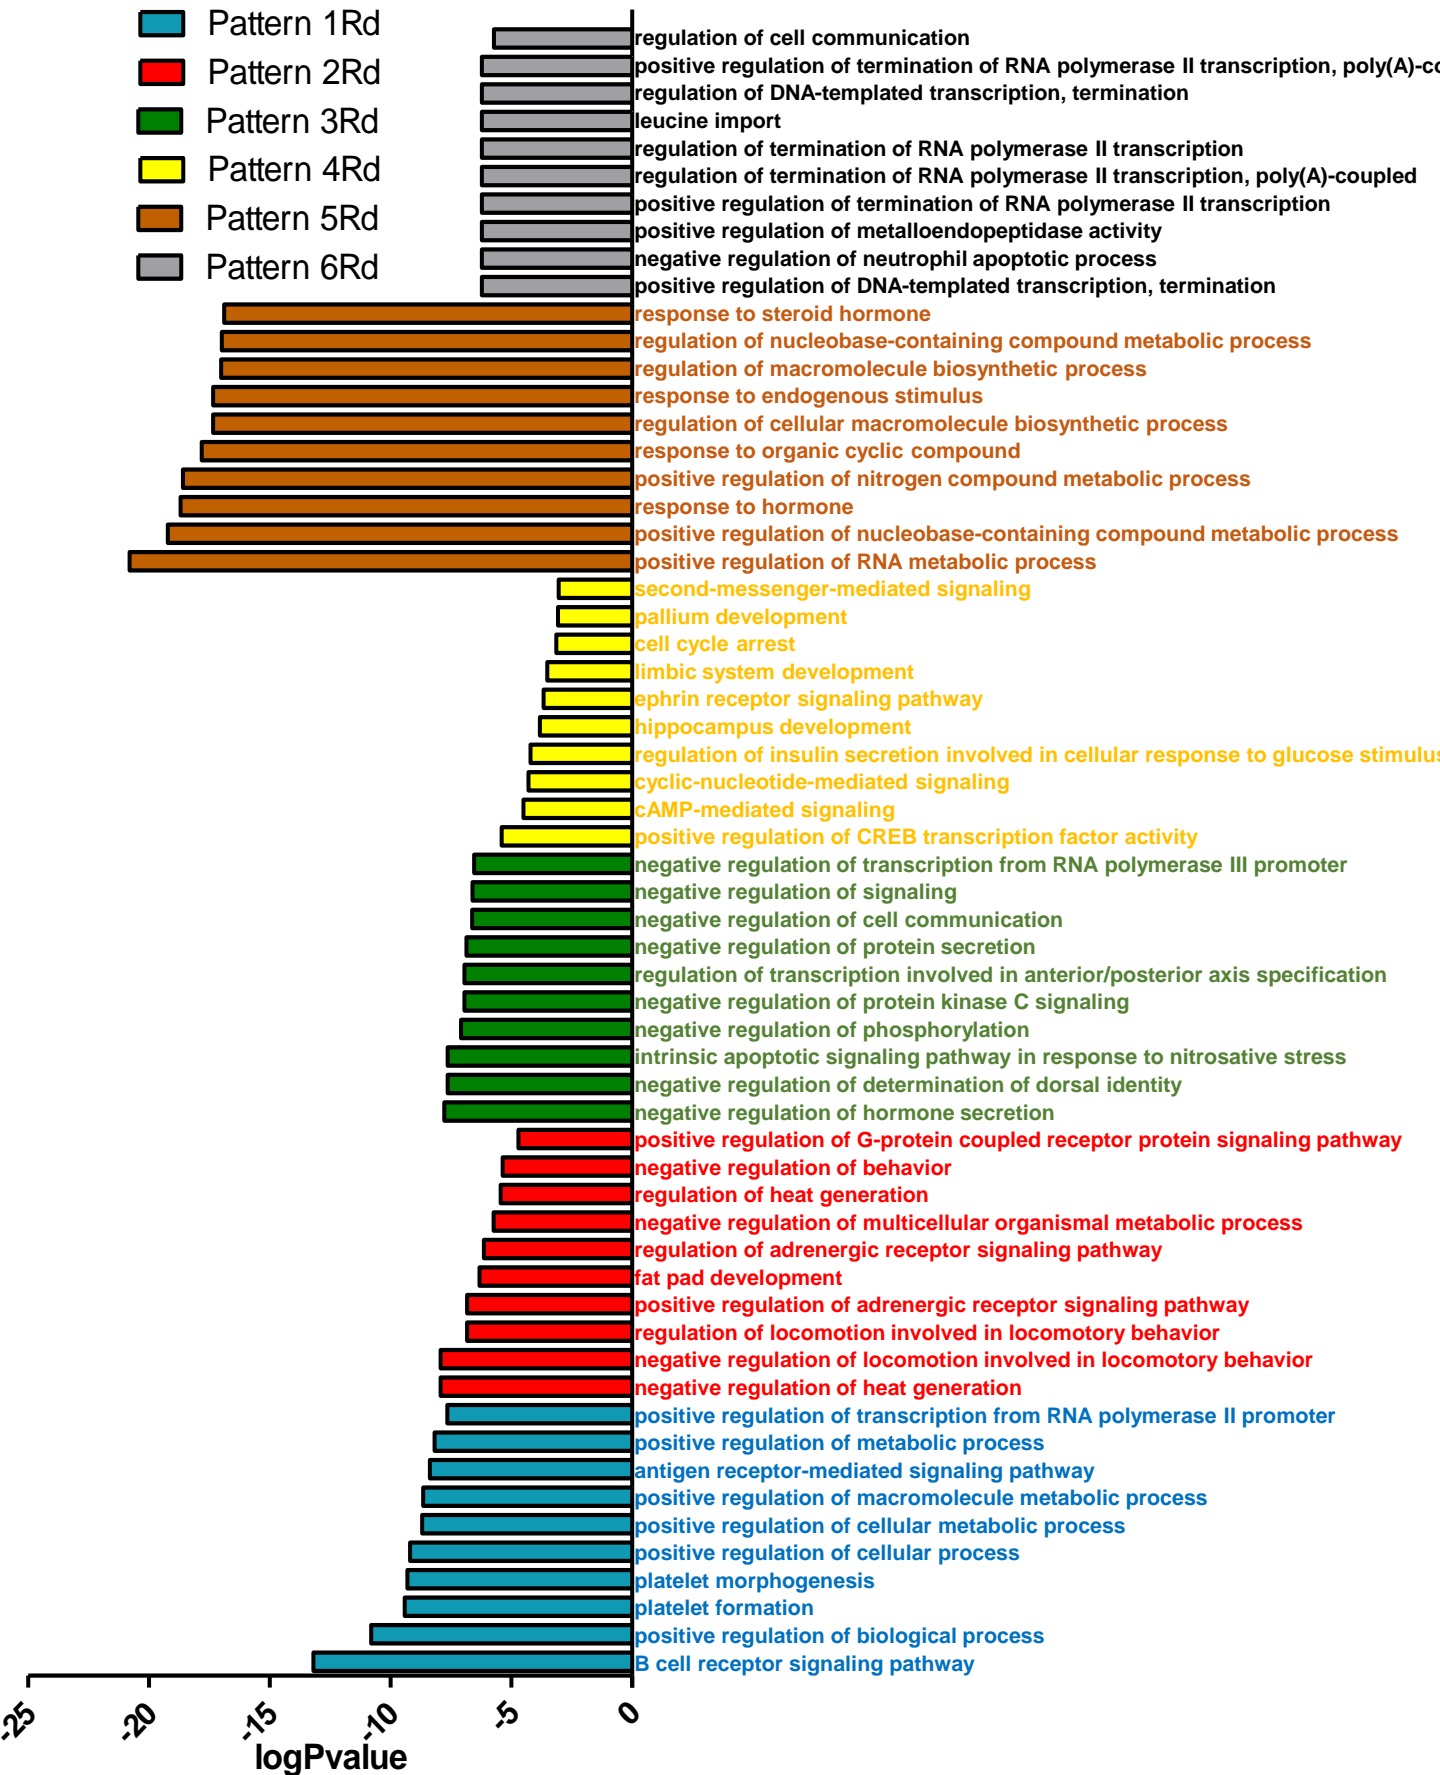

I

178

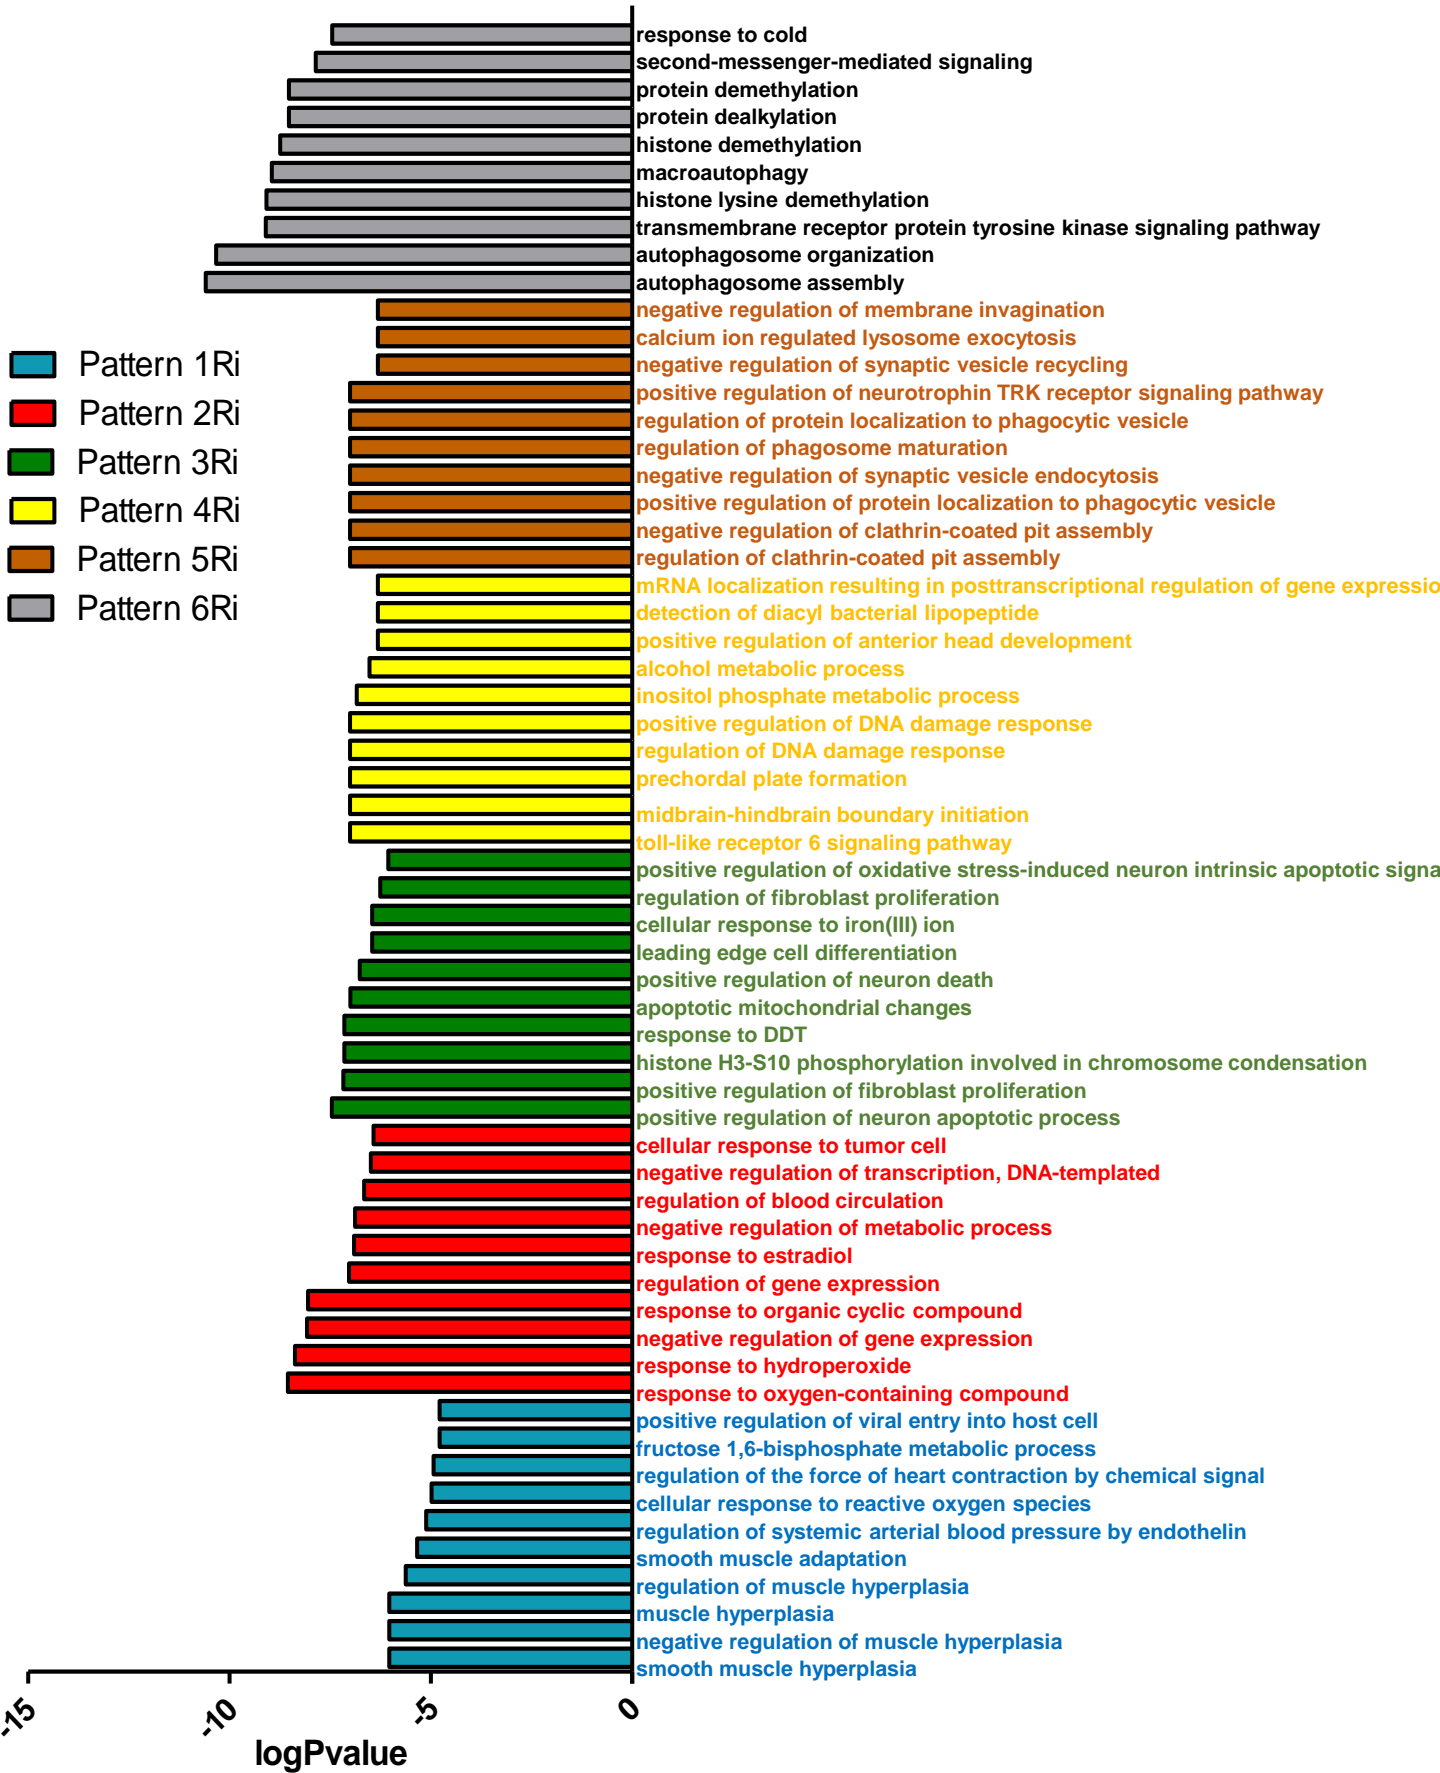

Supplement: pbio.2006347.s004.pdf [file pbio.2006347.s004.pdf]
