# Supplementary material for: Transcriptional outcomes and kinetic patterning of gene expression in response to NF-κB activation
Source: PubMed Central journal article supplement (PMC6147668; doi:10.1371/journal.pbio.2006347), 2018-09-10
Supplement: pbio.2006347.s001.pdf [file pbio.2006347.s001.pdf]

**A**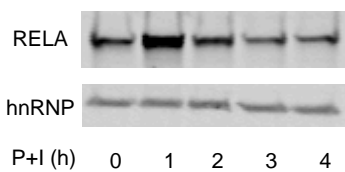**B**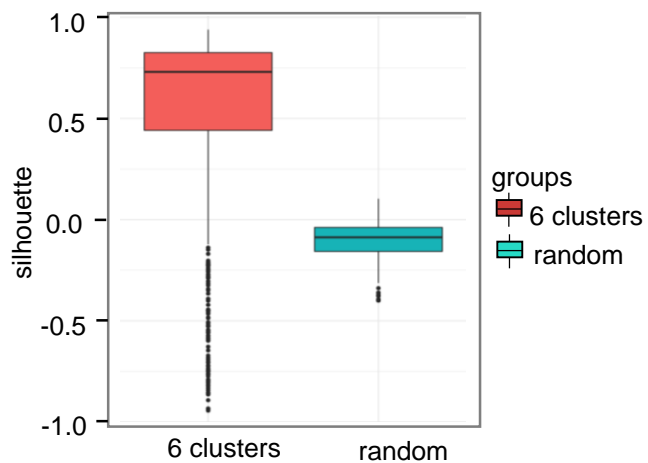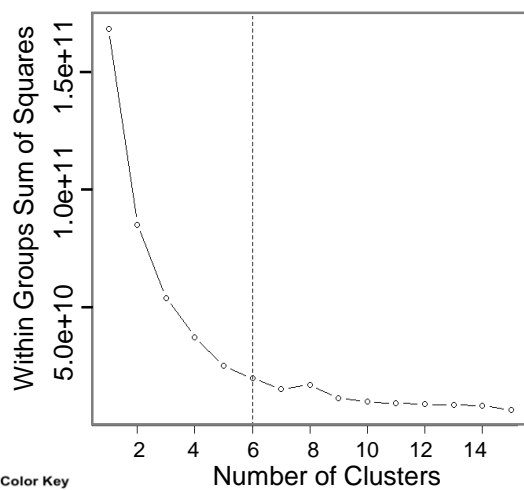**C**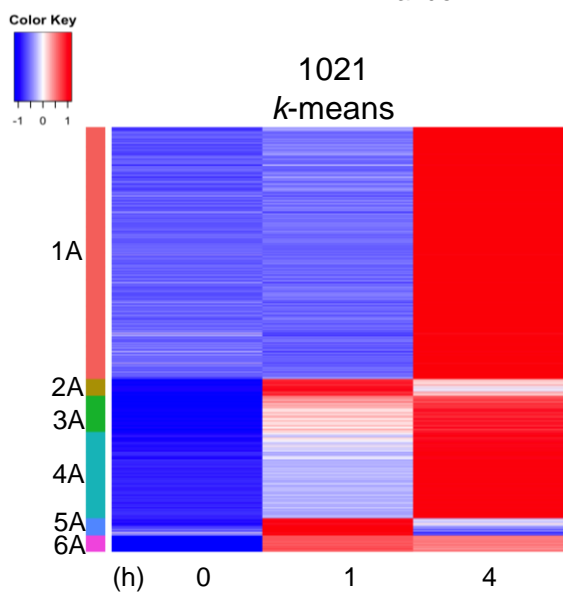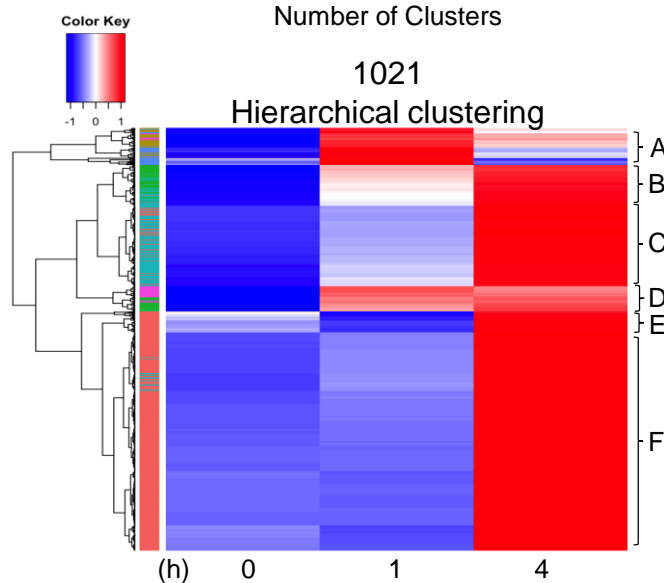**D**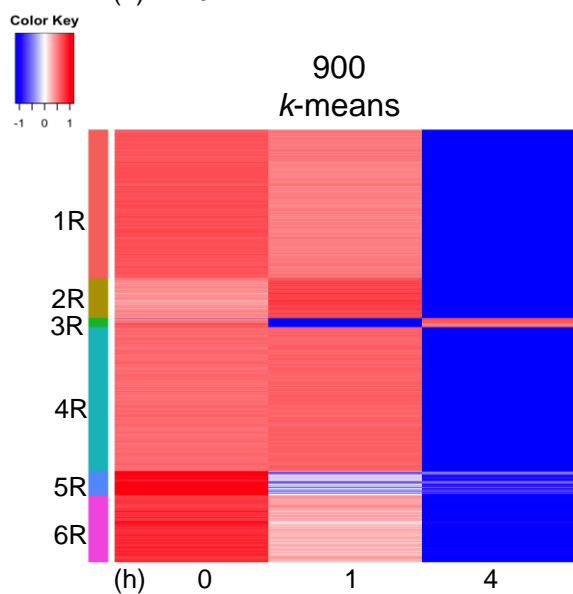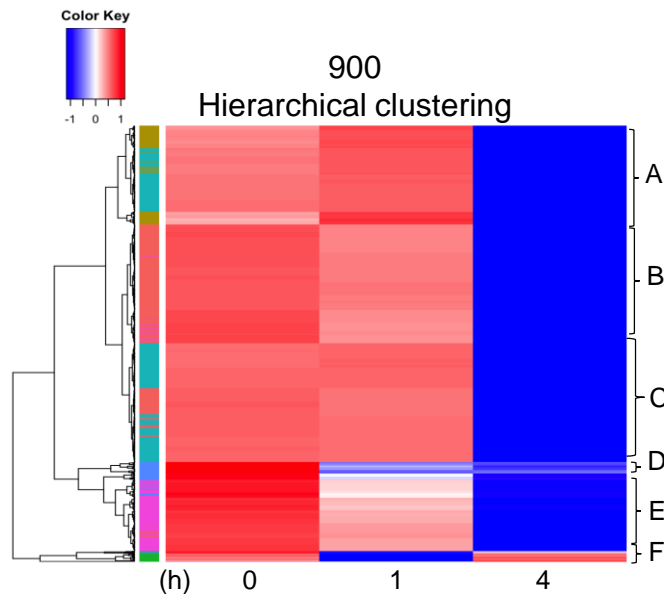

1021

E

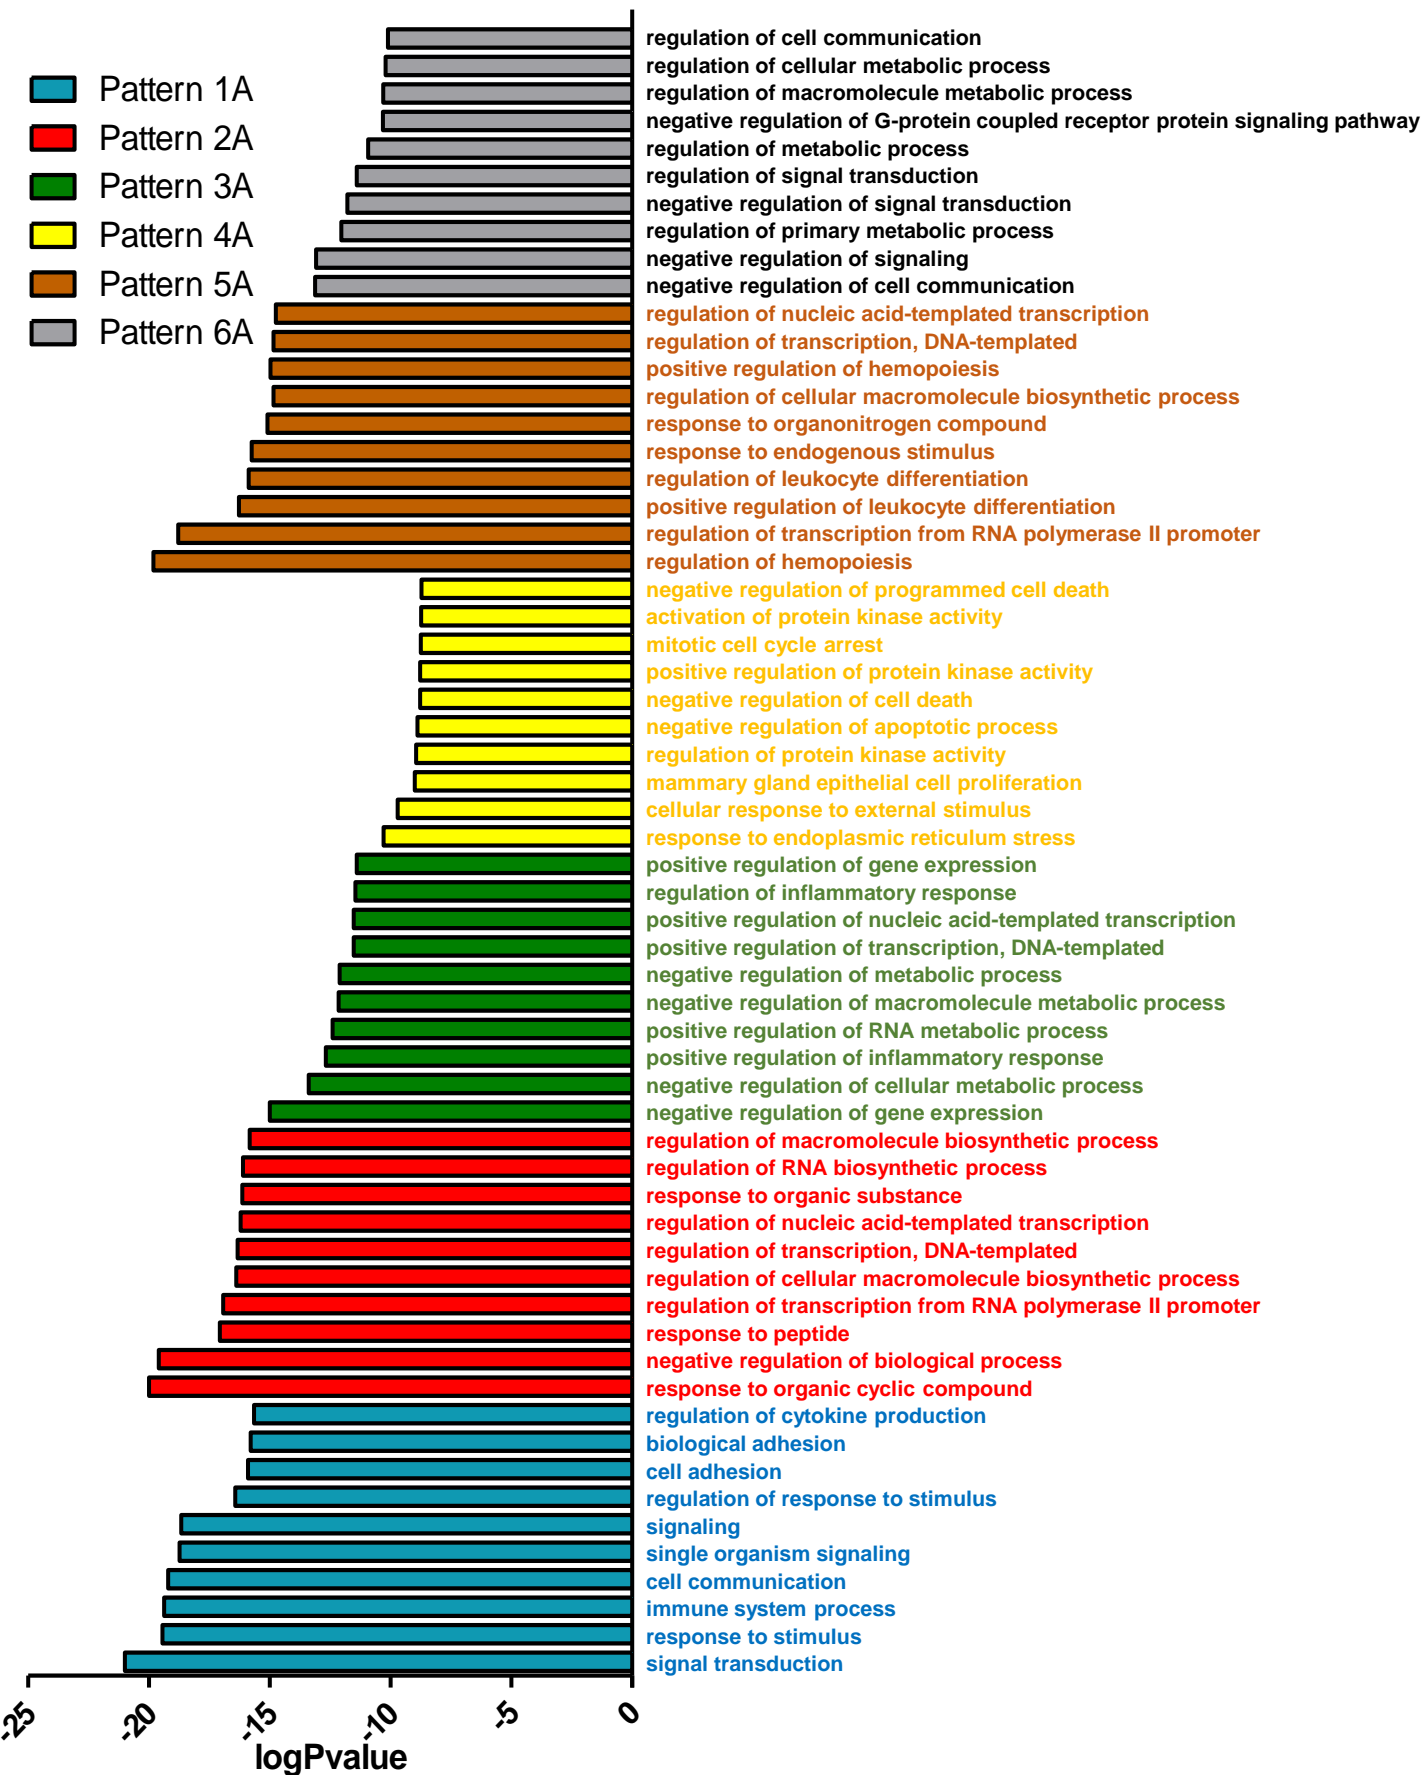

F

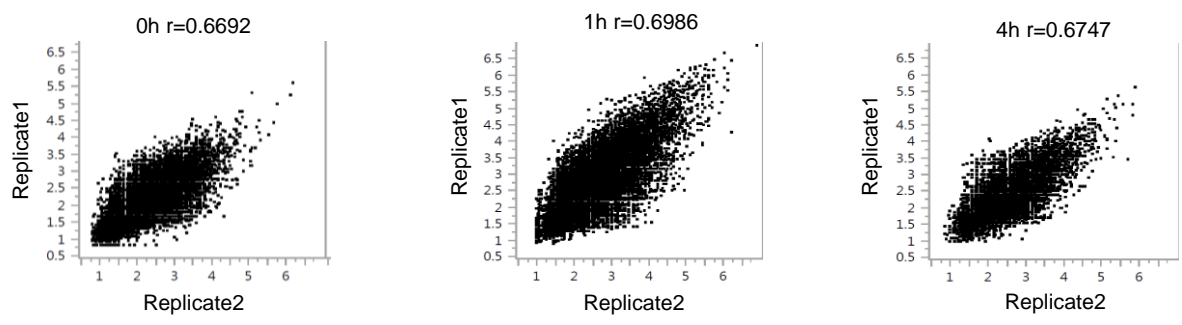

G

0h (345)

1h (2847)

4h (593)

| Consensus sequence | P-value | Motif Name   | Consensus sequence | P-value | Motif Name   | Consensus sequence | P-value | Motif Name   |
|--------------------|---------|--------------|--------------------|---------|--------------|--------------------|---------|--------------|
|                    | 1e-24   | NFkB-p65     |                    | 1e-682  | NFkB-p65     |                    | 1e-147  | NFkB-p65     |
|                    | 1e-22   | NFkB-p65-Rel |                    | 1e-384  | NFkB-p65-Rel |                    | 1e-142  | AP.1         |
|                    | 1e-16   | PU.1(ETS)    |                    | 1e-343  | NFkB-p50,p52 |                    | 1e-100  | NFkB-p65-Rel |
|                    | 1e-11   | NFkB-p50,p52 |                    | 1e-317  | AP.1         |                    | 1e-90   | NFkB-p50,p52 |
