# Supplementary material for: Transcriptional outcomes and kinetic patterning of gene expression in response to NF-κB activation
Source: PubMed Central journal article supplement (PMC6147668; doi:10.1371/journal.pbio.2006347), 2018-09-10

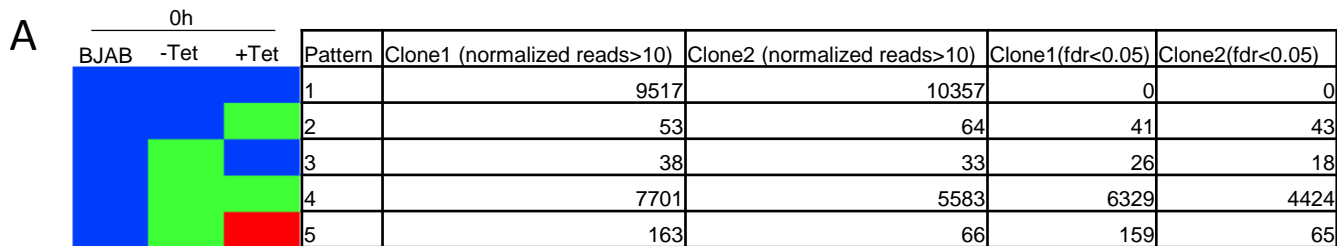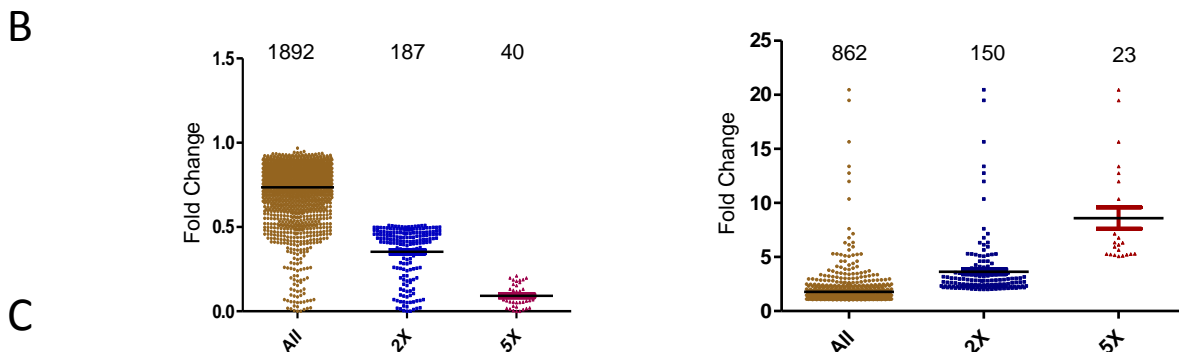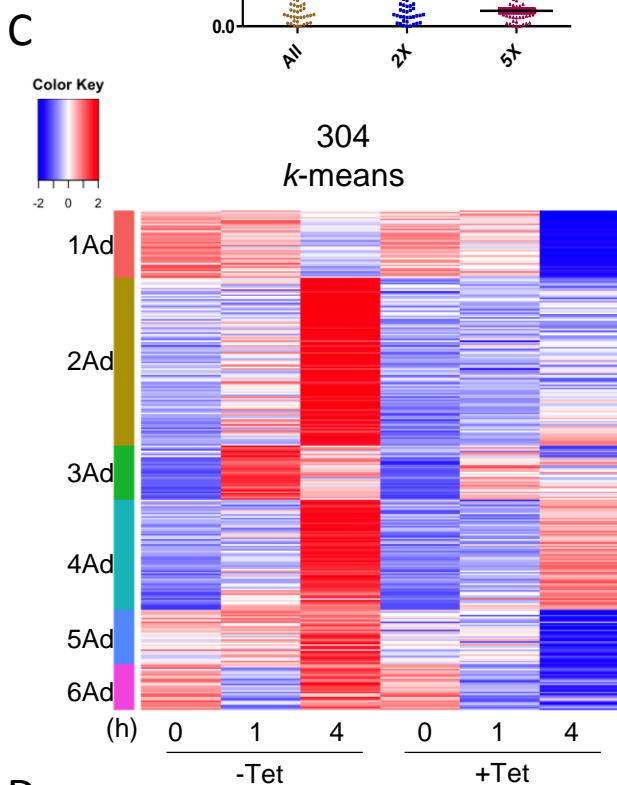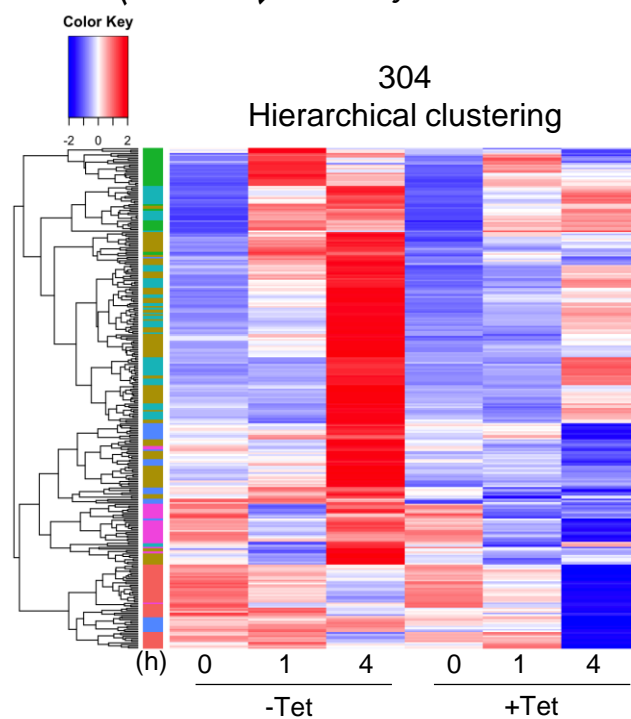

**D**

RELA binding, dnkB $\downarrow$  (304) -promoters

| Consensus sequence   | P-value | Motif Name   |
|----------------------|---------|--------------|
| <b>GGAAATTC</b> CC   | 1e-13   | NFkB-p65-Rel |
| <b>GGGGAATTC</b> C   | 1e-10   | NFkB-p65     |
| <b>GGGGAAATTC</b> CC | 1e-6    | NFkB-p50,p52 |

RELA binding, dnkB $\downarrow$  (304) -under peaks

| Consensus sequence   | P-value | Motif Name   |
|----------------------|---------|--------------|
| <b>GGGGAATTC</b> C   | 1e-129  | NFkB-p65     |
| <b>GGAAATTC</b> CC   | 1e-68   | NFkB-p65-Rel |
| <b>GGGGGAATTC</b> CC | 1e-61   | NFkB-p50,p52 |

**E**

Under peaks (304)

| Cluster number   | Consensus sequence | P-value | Motif Name | % of Targets Sequences with Motif |
|------------------|--------------------|---------|------------|-----------------------------------|
| Patterns 2Ad,4Ad | <b>GGGGAATTC</b> C | 1e-69   | REL        | 33.73%                            |
|                  | <b>ATGACTCA</b> AT | 1e-27   | JunB(bZIP) | 28.99%                            |
|                  | <b>AAGGGGA</b> ACT | 1e-18   | Sfp1       | 10.65%                            |
| Pattern 3Ad      | <b>GGGGAATTC</b> C | 1e-16   | NFkB-p65   | 42.42%                            |
|                  | bZIP motif         | NA      | NA         | NA                                |

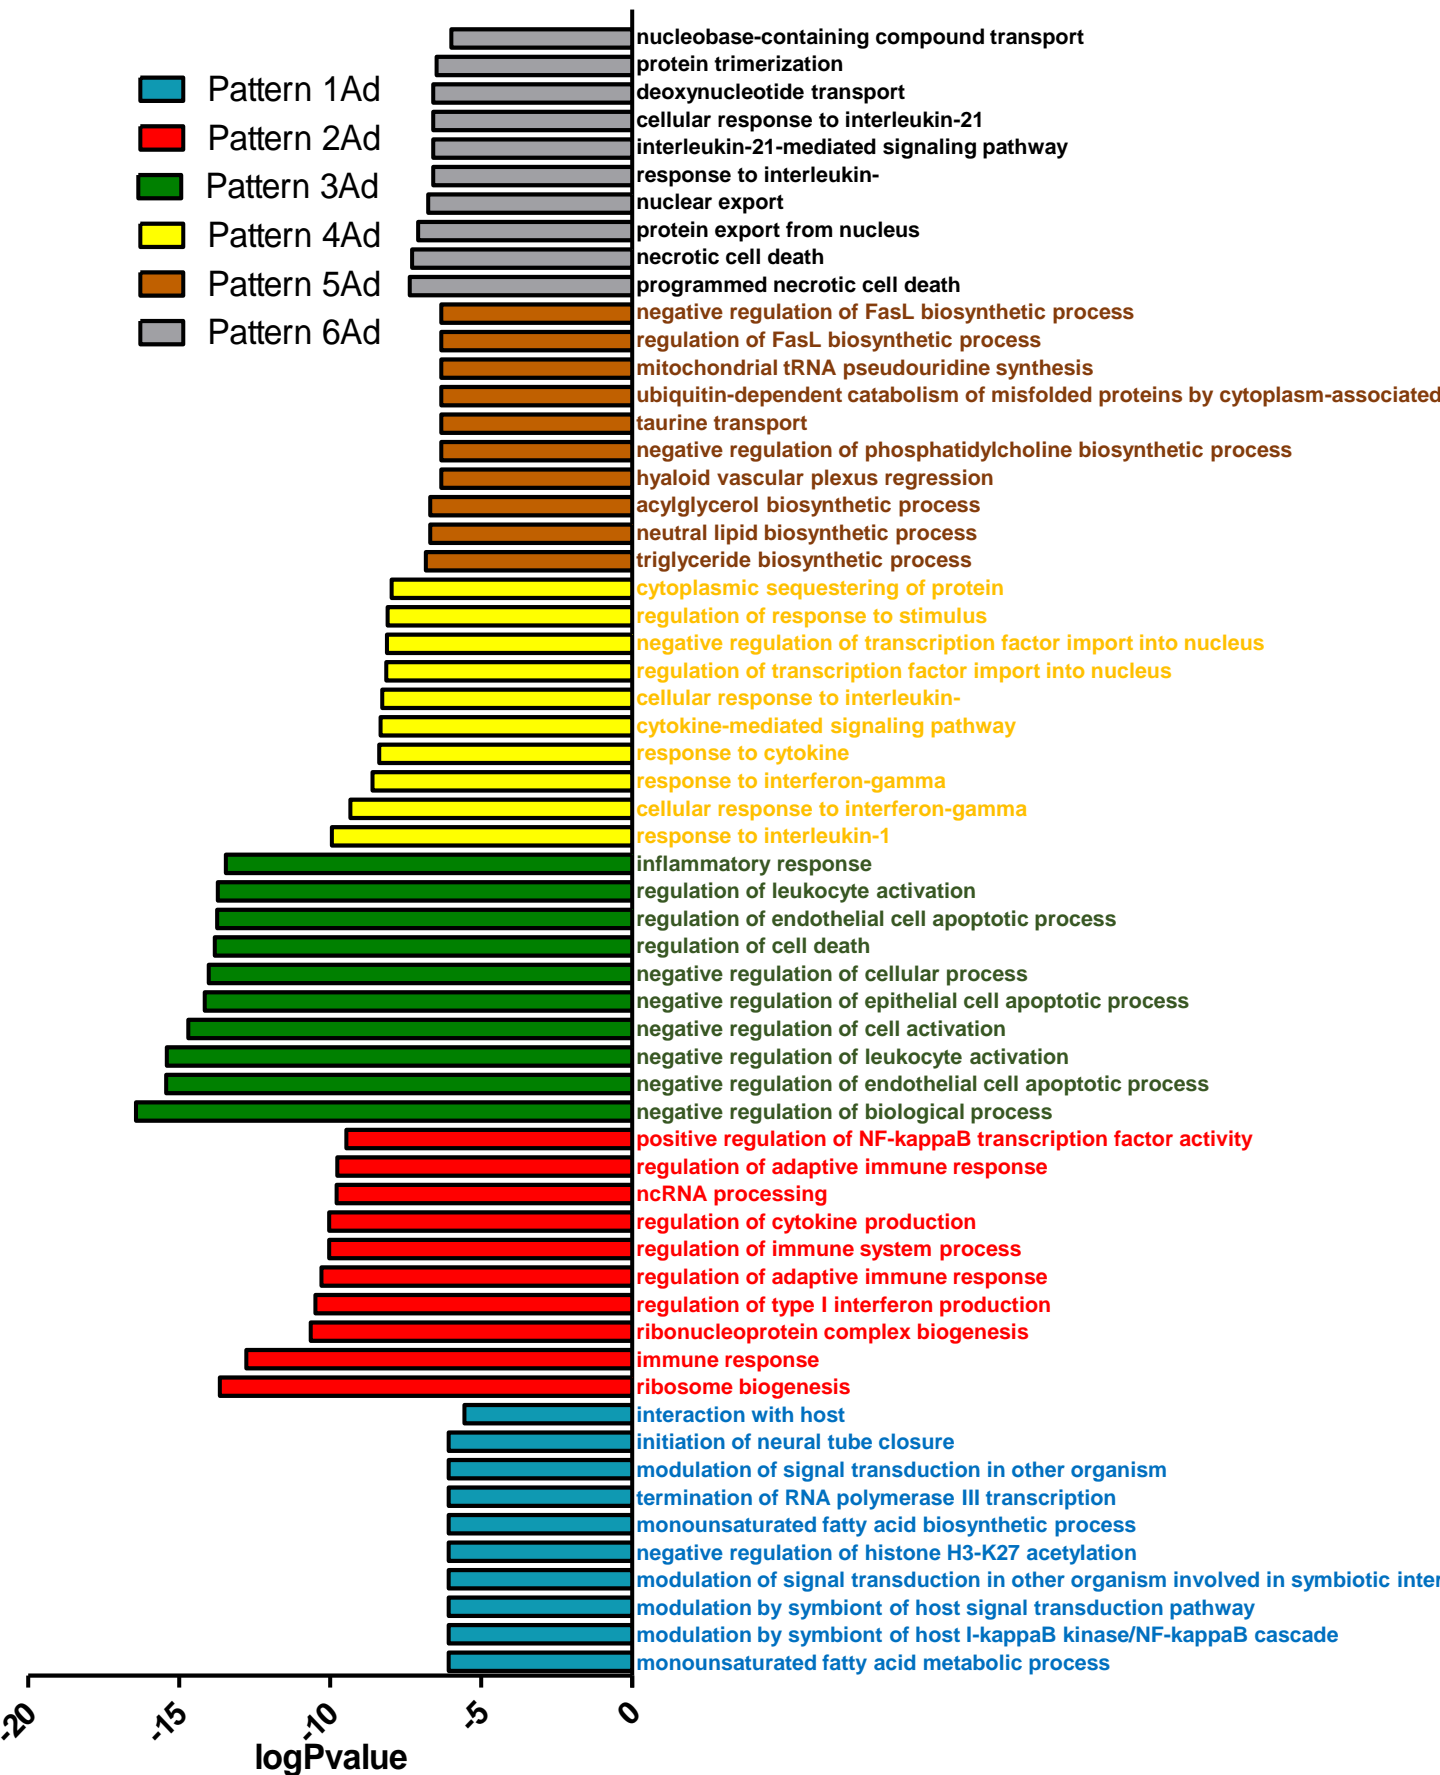

**G**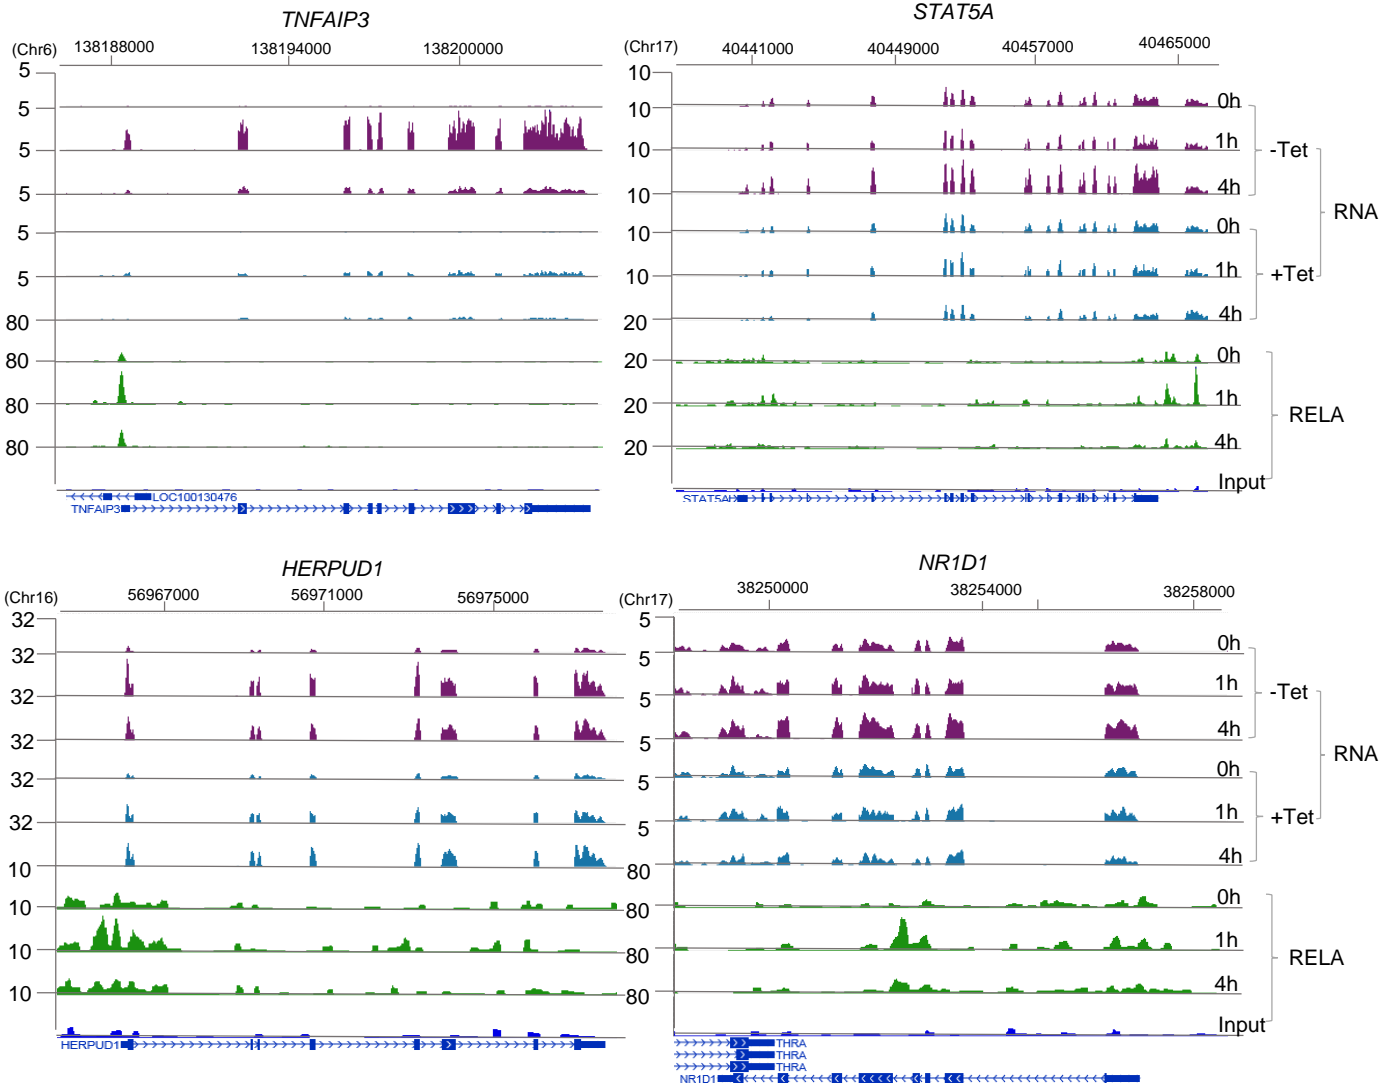

Supplement: pbio.2006347.s002.pdf [file pbio.2006347.s002.pdf]
