# Supplementary material for: Transcriptional outcomes and kinetic patterning of gene expression in response to NF-κB activation
Source: PubMed Central journal article supplement (PMC6147668; doi:10.1371/journal.pbio.2006347), 2018-09-10

A

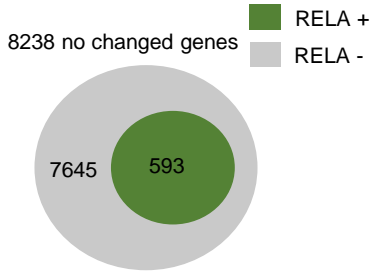

B

Under 593 RELA peaks

| Consensus sequence | P-value | Motif Name   |
|--------------------|---------|--------------|
|                    | 1e-89   | NFKB-p65     |
|                    | 1e-52   | NFKB-p65-Rel |
|                    | 1e-38   | AP.1         |
|                    | 1e-27   | NFKB-p50,p52 |

Promoter regions: no significant motif

C

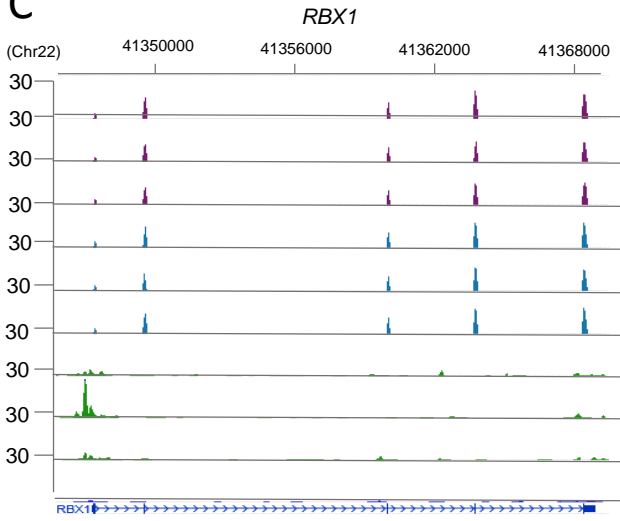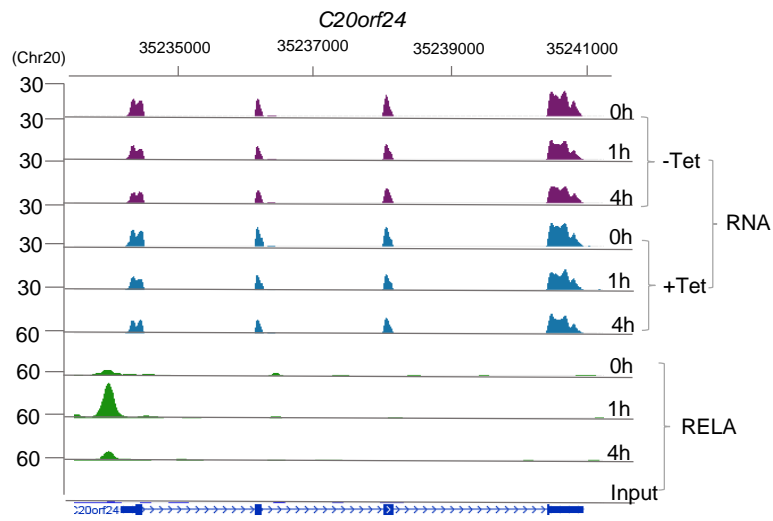

D

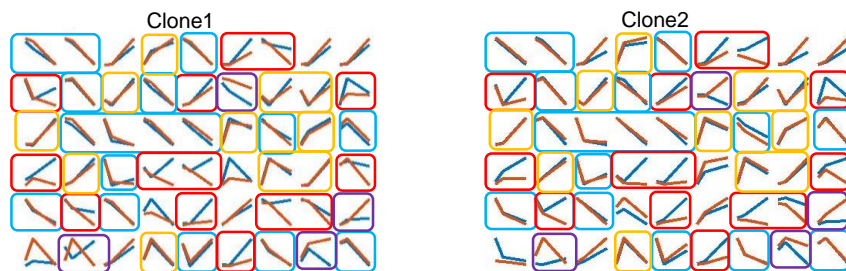

E

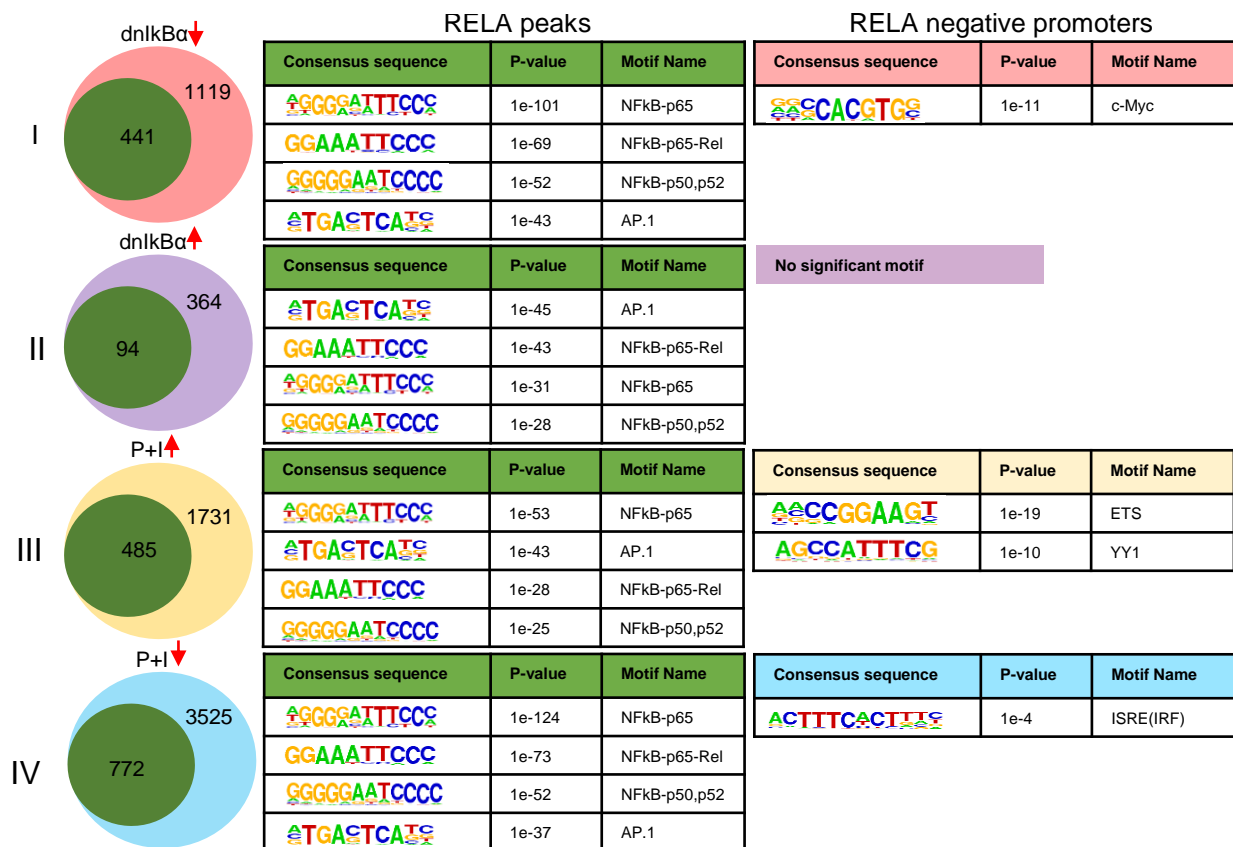

F

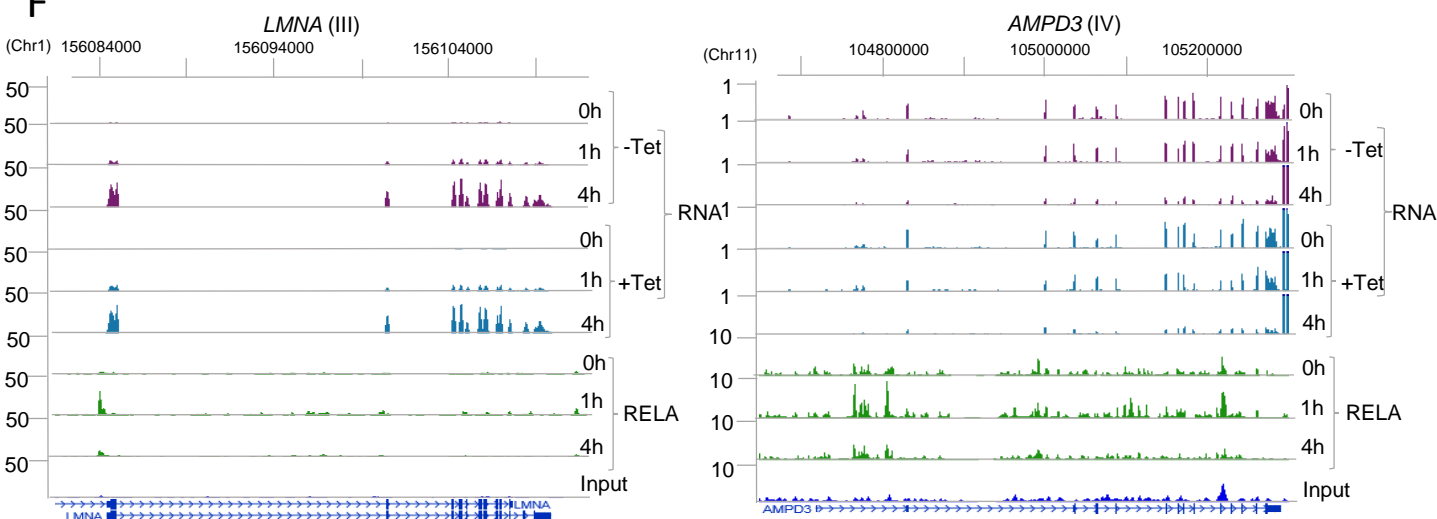

Supplement: pbio.2006347.s005.pdf [file pbio.2006347.s005.pdf]
