# Supplementary material for: Transcriptional outcomes and kinetic patterning of gene expression in response to NF-κB activation
Source: PubMed Central journal article supplement (PMC6147668; doi:10.1371/journal.pbio.2006347), 2018-09-10

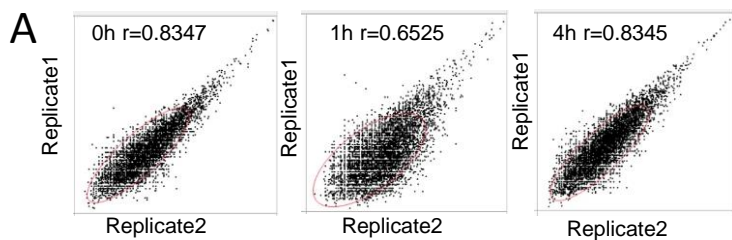

**B** Polymerase II binding

| NF- $\kappa$ B target genes | 0h |
|-----------------------------|----|
| Direct(130)                 | 50 |
| Indirect(78)                | 13 |

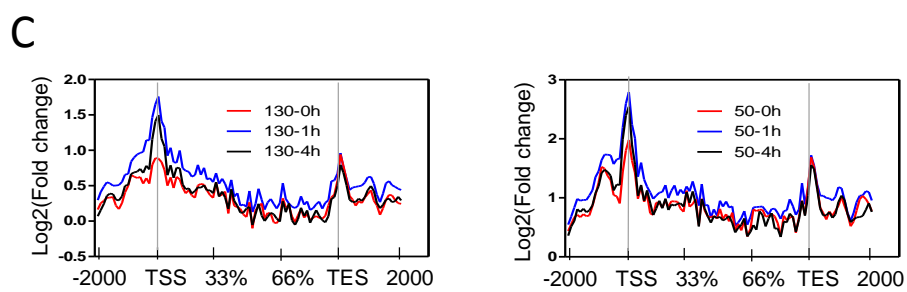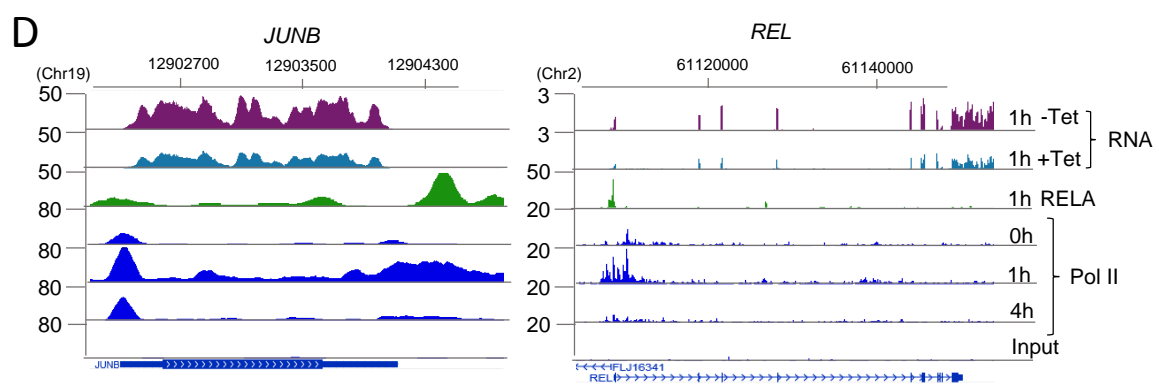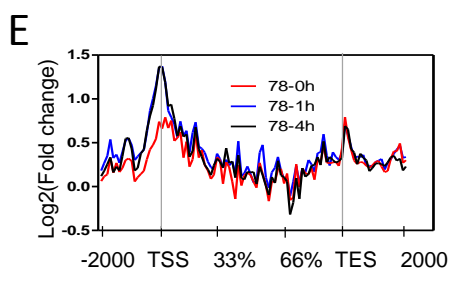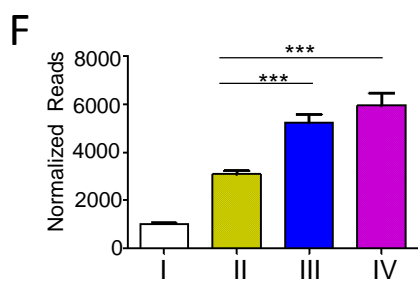

**G**

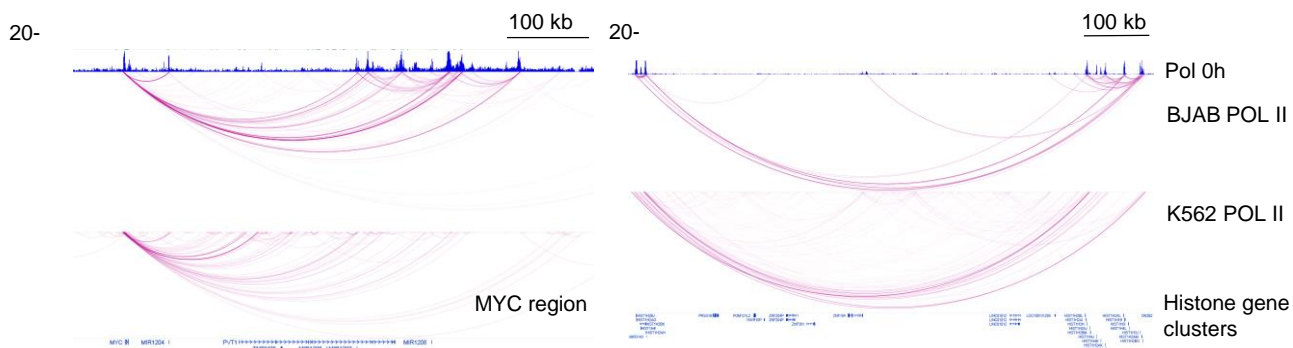

**H**

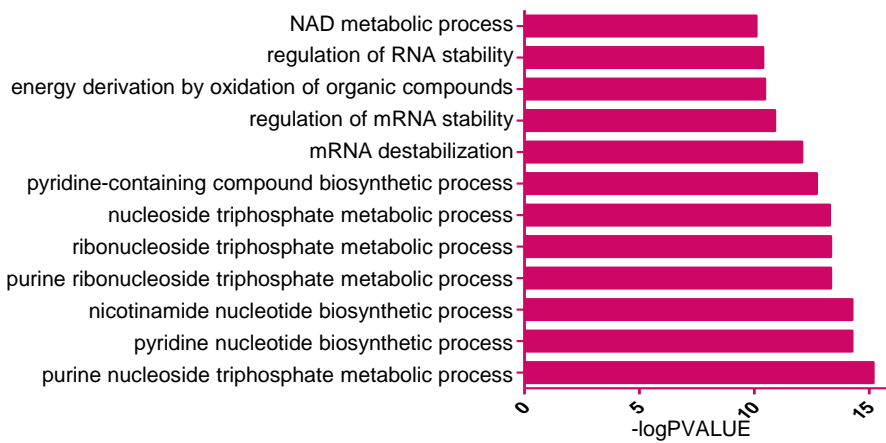

**I**

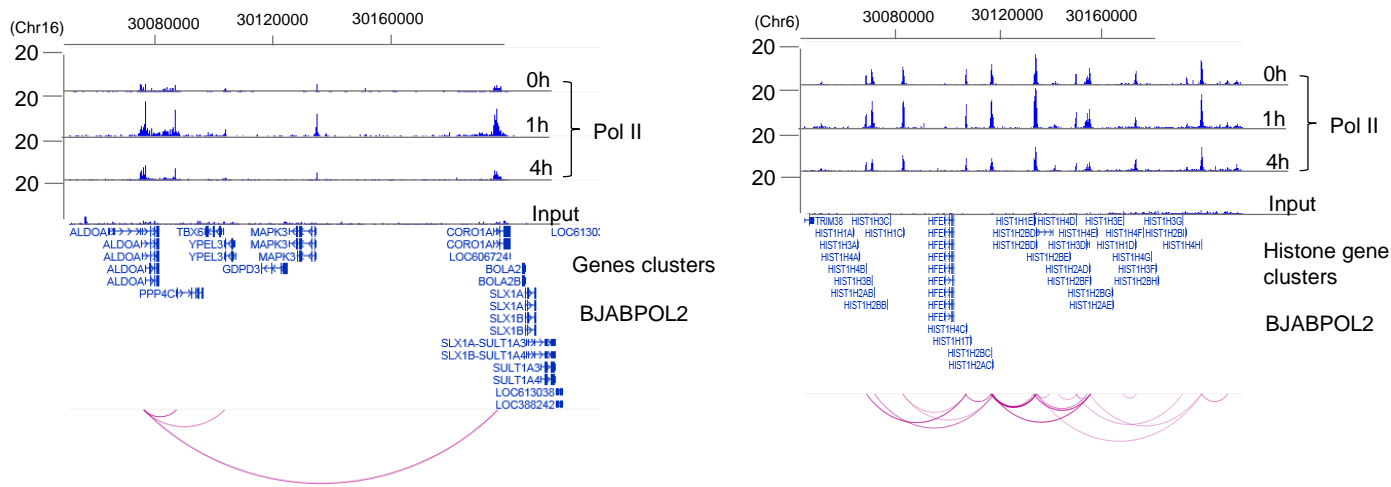

**J**

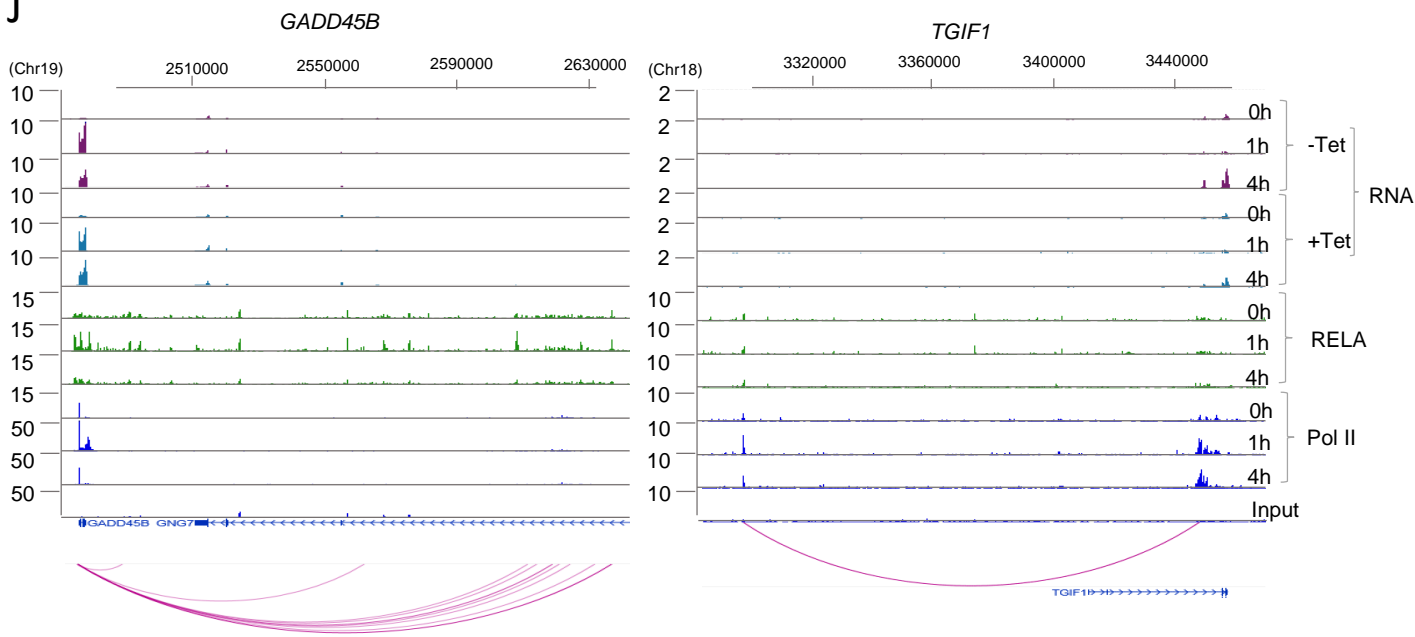

K

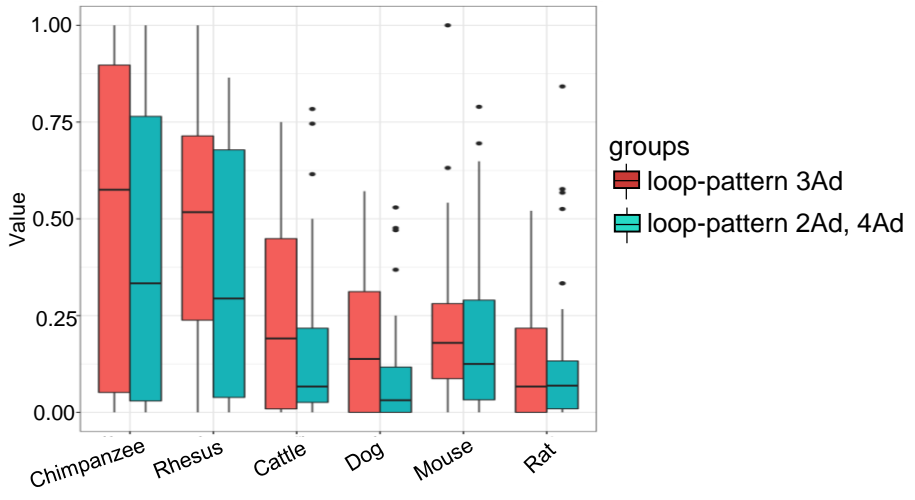

Supplement: pbio.2006347.s006.pdf [file pbio.2006347.s006.pdf]
