# Supplementary material for: Transcriptional outcomes and kinetic patterning of gene expression in response to NF-κB activation
Source: PubMed Central journal article supplement (PMC6147668; doi:10.1371/journal.pbio.2006347), 2018-09-10
Supplement: pbio.2006347.s007.pdf [file pbio.2006347.s007.pdf]

A

|           |             |               |               |            |           |          |           |           |              |               |               |              |
|-----------|-------------|---------------|---------------|------------|-----------|----------|-----------|-----------|--------------|---------------|---------------|--------------|
| CCL3L1    | ZNF165      | ZMIZ1-AS1     | CTD-2541M15.1 | SLCO2B1    | NPIP3     | KATNBL1  | PACSIN2   | CSTB      | DMWD         | SLC12A8       | CTC-250I14.6  | NPHP4        |
| SNX9      | MAK         | DFNB31        | SEMA7A        | METRNL     | LINC00963 | ZNF8     | SLC7A1    | THAP4     | DYNC2H1      | RP1-228H13.5  | RP11-642P15.1 | MDM4         |
| FOSB      | LIF         | APOBEC3B      | CRYM          | ABTB2      | NDRG4     | MYBPC1   | MYO1C     | SLC16A6   | ANKRD28      | KIF9          | IL2RB         | CDKN2B-AS1   |
| LINC01010 | NEDD4L      | IGF2R         | CTD-2184D3.5  | GALNT2     | RFX2      | ZBTB43   | GABPB1    | OTUD4     | RAB7A        | LBH           | ARHGAP44      | TOB1         |
| ZNF365    | RGS1        | NAALADL2-AS2  | RP11-574H6.1  | OR7E47P    | BTBD3     | SLC35E4  | SCIMP     | C16orf72  | WEE1         | ITGB3         | ZNFX1         | TSC22D2      |
| PPY       | RRN3P1      | ZFP36L1       | PHACTR1       | MYEOV      | TRIM36    | MAML2    | BIRC7     | IRF2BP2   | SLC1A5       | ZSWIM6        | WARS          | RP11-481J2.2 |
| SLC22A1   | MIR155HG    | FAM102A       | NT5DC4        | TTLL10     | RBKS      | TRIB1    | RHOG      | INSIG1    | KSR1         | USP12         | ATP2B1        | GLA          |
| EGR3      | BHLHE41     | NPIP31        | PLEKHA7       | LINC-PINT  | C16orf46  | JAM2     | LINC00936 | WDR66     | RASL11A      | LINC00355     | RP11-458D21.1 | CCL4L1       |
| CHRNA1    | TRPV3       | LUCAT1        | RP11-672A2.6  | ZFP69B     | SACS      | RIN3     | RAB11FIP1 | ITPKB-IT1 | FGFRL1       | ATF5          | NBL1          |              |
| ANKRD30B  | ZBTB32      | BHLHE40       | TNS1          | RHOBTB3    | GAS7      | ITGAD    | RAB30     | ABR       | SPPL2A       | RP5-864K19.4  | RP11-638I2.8  |              |
| MTSS1     | MYADM       | S100A2        | RP11-540A21.2 | B3GNT7     | KLHL21    | DNAAF2   | CD70      | ELMSAN1   | TMEM2        | UBE2B         | CDYL2         |              |
| CORO6     | GJA3        | LINC00152     | RP11-465B22.3 | ZNF554     | PPL       | ID1      | TSNARE1   | TNIP2     | ZNF778       | KIAA1199      | RNF103-CHMP3  |              |
| SLAMF7    | PBX4        | IL36RN        | LINC00511     | LINC01060  | CARS      | SOLE     | TCF7      | ASIC3     | NRROS        | HSP90B1       | SUN1          |              |
| LINC00702 | ELL2        | IL36B         | AC003092.1    | WDFY1      | NEURL1    | NOTCH2NL | LASP1     | CLTC      | SLC9A1       | RP11-116N8.4  | NSMAF         |              |
| BACH2     | LRRC32      | WNT9A         | CABLES1       | SETX       | DUSP22    | PYGO1    | BACH1     | GPBP1     | CD97         | CTD-2516F10.2 | ZCCHC14       |              |
| CD163     | APCDD1L-AS1 | CD109         | CTD-2325P2.3  | TIPARP     | MATN1     | SERPINA9 | CLEC17A   | GFOD1     | TMEM178B     | KCP           | BIN2          |              |
| LY9       | LDLRAD4     | CTD-2532D12.4 | TVP23A        | RILPL2     | AMZ2P1    | NOTCH2   | LRCH1     | FAM222A   | WDR86        | ADORA2A-AS1   | C19orf26      |              |
| HES1      | DDIT3       | TENM4         | HRK           | SDC3       | RRAGC     | UBALD2   | CCDC64    | BAIAP3    | RP3-330M21.5 | CTNNA1        | ZSWIM4        |              |
| AHNAK     | IL6R        | RP11-20J15.2  | RP3-468K18.5  | KIF25-AS1B | MAP1LC3   | EPB41L2  | SUB1      | TNFRSF14  | ITK          | RP4-781K5.2   | FNDC3B        |              |
| GDF15     | C5AR1       | SLC30A10      | NAALADL2      | FNIP1      | UBTD2     | C7orf72  | GARS      | AP5Z1     | MATN1-AS1    | LAMP3         | RHEB          |              |

Supplementary Table 1

B

|          |          |         |          |               |               |               |               |               |
|----------|----------|---------|----------|---------------|---------------|---------------|---------------|---------------|
| PTPRS    | SNX29P2  | NCOA2   | KREMEN2  | ALDH3B2       | FADS2         | PLEKHG1       | ATXN1         | ABI3          |
| ACE      | RNF135   | RXRA    | HDAC7    | JADE2         | CTSZ          | RP4-798A10.7  | CD79B         | ELL3          |
| PSTPIP1  | PLCG2    | VAV1    | MAML3    | BZRAP1-AS1    | PARP10        | AC009005.2    | FOXI1         | RP11-111A22.1 |
| EHBP1L1  | MAP3K7CL | BTN3A2  | SIPA1L3  | ASB13         | CCDC106       | RP11-255H23.2 | NEURL2        | RP11-571M6.15 |
| NARFL    | KAZALD1  | TP53I11 | IGLL5    | PRIM1         | BCL11A        | CTA-126B4.7   | SLC28A3       | CTD-2545G14.7 |
| NEIL1    | SYVN1    | ASB2    | PROC     | UBTF          | DBP           | OSBPL10       | SPATA12       |               |
| TREX1    | CUEDC1   | TMCC2   | SH2D3C   | RP11-386G11.5 | RP11-16K12.1  | C2ORF15       | PLEKHA2       |               |
| COASY    | FAM213B  | TTC9    | PVRIG    | BANK1         | RP11-111M22.2 | USP2          | RP11-296A16.1 |               |
| NTHL1    | PIK3C2B  | PTK2B   | PDGFD    | HSH2D         | PCDHGB2       | SH2B2         | PCDHGC4       |               |
| FGD2     | MTMR12   | MEF2B   | PIK3CD   | RP11-640M9.1  | RHOBTB2       | PMEPA1        | IFNG-AS1      |               |
| ZNF395   | DLG2     | CBLN2   | EPB41L1  | RAB11FIP4     | HHEX          | CORO2B        | WNK2          |               |
| C21orf33 | PPP1R18  | MEF2C   | KCNN3    | STX10         | ELOVL6        | ADAMTSL2      | LPP-AS2       |               |
| ZNF860   | SORL1    | TTC23   | PLXNC1   | HECW2         | ARHGEF3       | CCDC102A      | TOB1-AS1      |               |
| IQSEC1   | ABHD8    | CNR1    | DIXDC1   | EPB41L4A      | ZBTB14        | CALHM3        | PCDHGA10      |               |
| TCF4     | LRRK1    | TRIM8   | SYK      | DHRS13        | Z95704.4      | MGAT3         | PTPN6         |               |
| RAC2     | VAV3     | GRAP    | TSPAN18  | MAMSTR        | AC010761.9    | ABCG1         | CDC42BPB      |               |
| DTX1     | PILRA    | TBX10   | ZBTB12   | HSD17B6       | NRM           | ARHGAP23      | PCDHGA12      |               |
| ZBTB7B   | KBTBD3   | PLEKHF2 | EHD3     | GALNT6        | TMEM116       | C1orf220      | SH3PXD2A      |               |
| LMTK3    | SYPL1    | CCDC85C | KIAA0040 | PIK3R2        | AC096559.1    | SIT1          | LRP2          |               |
| CPNE5    | CSPG4    | NFIA    | TSC22D1  | SYNPO         | NCKAP5        | DOK7          | CUX2          |               |

Supplementary Table 1
