# Supplementary material for: Transcriptional outcomes and kinetic patterning of gene expression in response to NF-κB activation
Source: PubMed Central journal article supplement (PMC6147668; doi:10.1371/journal.pbio.2006347), 2018-09-10
Supplement: pbio.2006347.s008.pdf [file pbio.2006347.s008.pdf]

|              |              |           |        |               |           |           |          |
|--------------|--------------|-----------|--------|---------------|-----------|-----------|----------|
| CCL3L1       | SLC7A1       | CCL4      | STAT5A | IL2RG         | MAPKAPK5  | RCC2      | TAPBP    |
| SLC22A1      | IRF2BP2      | NFKBIZ    | GCLC   | SLC25A13      | ARHGAP25  | POLR3K    | ORAI1    |
| CCL4L1       | DUSP22       | NFKBID    | CFLAR  | MAML2         | NXT1      | PARP14    | LPXN     |
| SNX9         | GAS7         | CD83      | MYC    | PABPC4        | ACTN4     | LMNB2     | IRF1     |
| IL36RN       | GABPB1       | CACNA1E   | SOD2   | TRAF4         | PRCC      | SMPD4     | SYNJ2    |
| IL36B        | LRCH1        | SGK1      | IFIH1  | ZBTB1         | BAZ1A     | RQCD1     | TAF4B    |
| LIF          | CSTB         | EBI3      |        | KIAA0247      | TIPIN     | SPATA13   | HLA-B    |
| MIR155HG     | CBX6         | TNFAIP3   |        | NUP188        | CCDC86    | NUP62     | THOC1    |
| HES1         | SERPINA9     | PPP1R15A  |        | CRCP          | ATP1A3    | DDX42     | HLA-A    |
| UTP3         | TNIP2        | PLAU      |        | DEXI          | PDSS1     | VOPP1     | BLM      |
| NR1D1        | RP11-481J2.2 | IER3      |        | GPX4          | EMC1      | TIMM13    | NUP153   |
| POU2AF1      | GPBP1        | DDX21     |        | PTRH2         | QTRTD1    | GUCD1     | NINJ1    |
| PPAN         | ZNF106       | JUNB      |        | RIOK1         | NLGN4X    | MOB3A     | PPIF     |
| MAK16        | ARHGAP24     | PIM1      |        | LINC00877     | DDN       | ZBTB2     | SLC6A6   |
| CLEC17A      | CTB-58E17.1  | NFKB1     |        | TNFRSF14      | TCF20     | SCD       | SLC39A11 |
| CIITA        | SNAPC4       | MAP2K3    |        | IGF2BP3       | SLC39A1   | SLC25A19  | TRAF3    |
| UBTF         | ZFP36L2      | MAP3K8    |        | CTD-2130O13.1 | GNL3      | FCRL3     | SH2B3    |
| CBLN2        | ELMSAN1      | BTG2      |        | CHD4          | LETM1     | SH3BP2    | POU2F2   |
| KIF25-AS1    | STK10        | PIM3      |        | GTF3C4        | ASXL1     | PGAM5     | WDR4     |
| NAALADL2     | PLXNA1       | GADD45B   |        | PES1          | MAN2B1    | SCO2      | PRMT1    |
| RILPL2       | NOTCH2       | EMP3      |        | ABCF1         | STAT6     | KDM2B     | SPEN     |
| PLEKHA7      | IL27RA       | NFKBIA    |        | TOR3A         | SLC35F2   | MFNG      | RUNX3    |
| RP11-672A2.6 | KLHL18       | KLF10     |        | SLC39A6       | XPO6      | XRCC2     | SCARB1   |
| NAALADL2-AS2 | PDXK         | ZC3H12A   |        | N4BP3         | RASAL2    | TTLL12    | ARHGAP17 |
| APOBEC3B     |              | DOT1L     |        | TNPO2         | ENTPD1    | LARP1     | TBC1D14  |
| PHACTR1      |              | RGS16     |        | ARHGEF2       | GRSF1     | PISD      | SIN3A    |
| DNAAF2       |              | NFKBIE    |        | NOC3L         | PUS1      | AMER1     | TAP1     |
| SACS         |              | MAPK6     |        | STX6          | NOLC1     | ICAM2     | TMEM97   |
| ABTB2        |              | RELB      |        | REPIN1        | SLC35E1   | KREMEN2   | TNIP1    |
| OTUD4        |              | IL10      |        | TRIP13        | TBL3      | C10orf128 | TRAF2    |
| MYO1C        |              | HERPUD1   |        | LTV1          | SNX29     | IL21R     | PPARGC1B |
| JAM2         |              | ZBTB10    |        | NLN           | JAK3      | CD3EAP    | TP53     |
| UBTD2        |              | NFKB2     |        | TTC27         | METTTL21A | BLOC1S4   |          |
| UBALD2       |              | IL411     |        | SYNGR2        | LPCAT1    | SURF6     |          |
| IGF2R        |              | TRAF1     |        | TRIT1         | KIAA1217  | POLR3H    |          |
| LRRC32       |              | IER5      |        | IFRD2         | ESPL1     | ASB2      |          |
| MYEOV        |              | RND1      |        | DDX31         | RNF126    | ITPRIPL1  |          |
| KLHL21       |              | NFE2L2    |        | ILF3          | MRPL14    | DTX1      |          |
| CD97         |              | CD80      |        | PKM           | ZC3H7B    | CYB561A3  |          |
| NEDD4L       |              | REL       |        | MRPL36        | DNPH1     | GALNT14   |          |
| RHOBTB3      |              | CYLD      |        | LSAMP         | ATG16L2   | MTFP1     |          |
| GALNT2       |              | FLNA      |        | NOP14         | ERAP1     | RAPGEF5   |          |
| ITPKC        |              | OPTN      |        | ISG20L2       | HNRNPL    |           |          |
| SSTR2        |              | CHST11    |        | FKBP11        | ZNF664    |           |          |
| TMEM178B     |              | EFHD2     |        | NDUFAF4       | C17orf89  |           |          |
| RHOG         |              | PPP1R15B  |        | ATAD3B        | ZZZ3      |           |          |
| WDFY1        |              | NFKBIB    |        | ADO           | DGAT2     |           |          |
| CD70         |              | IFNGR2    |        | MRTO4         | SLC17A9   |           |          |
| ZNF267       |              | ICAM1     |        | NCOA3         | EPB41     |           |          |
| ECE1         |              | TNFRSF10B |        | WDR74         | LIMD2     |           |          |

Supplementary Table 2
